1 **Precise genome engineering in *Drosophila* using prime editing**

2  
3 Justin A. Bosch<sup>1,\*</sup>, Gabriel Birchak<sup>1</sup>, Norbert Perrimon<sup>1,2,\*</sup>

4  
5  
6 1. Department of Genetics, Blavatnik Institute, Harvard Medical School, Boston,  
7 MA

8 2. Howard Hughes Medical Institute

9  
10 **\*Corresponding authors:**

11  
12 Justin A. Bosch and Norbert Perrimon  
13 Harvard Medical School  
14 77 Avenue Louis Pasteur  
15 Dept. of Genetics, NRB 336  
16 Boston, MA 02115  
17 617-432-7672

18  
19 Email:

20 [perrimon@genetics.med.harvard.edu](mailto:perrimon@genetics.med.harvard.edu)

21 [jabosch@hms.harvard.edu](mailto:jabosch@hms.harvard.edu)

22  
23  
24  
25  
26  
27  
28  
29  
30  
31  
32  
33  
34  
35  
36  
37  
38  
39  
40  
41  
42  
43  
44  
45  
46

47 **Abstract:**

48

49 Precise genome editing is a valuable tool to study gene function in model  
50 organisms. Prime editing, a precise editing system developed in mammalian  
51 cells, does not require double strand breaks or donor DNA and has low off-target  
52 effects. Here, we applied prime editing for the model organism *Drosophila*  
53 *melanogaster* and developed conditions for optimal editing. By expressing prime  
54 editing components in cultured cells or somatic cells of transgenic flies, we  
55 precisely installed premature stop codons in three classical visible marker genes,  
56 *ebony*, *white*, and *forked*. Furthermore, by restricting editing to germ cells, we  
57 demonstrate efficient germ line transmission of a precise edit in *ebony* to ~50%  
58 of progeny. Our results suggest that prime editing is a useful system in  
59 *Drosophila* to study gene function, such as engineering precise point mutations,  
60 deletions, or epitope tags.

61

62

63

64

65

66

67

68

69

70

71

72

73

74

75

76

77

78

79

80

81

82

83

84

85

86

87

88

89

90

91

92

93 **Keywords:** genome editing, genome engineering, precise editing, *Drosophila*,  
94 prime editing, pegRNA, CRISPR  
95  
96  
97  
98  
99  
100  
101  
102  
103  
104  
105  
106  
107  
108  
109  
110  
111  
112  
113  
114  
115  
116  
117  
118  
119  
120  
121  
122  
123  
124  
125  
126  
127  
128  
129  
130  
131  
132  
133  
134  
135  
136  
137  
138

139 **Introduction:**

140

141 Genome editing is a versatile tool to study gene function in model organisms. For  
142 example, targeted gene deletions or point mutations can be used to disrupt gene  
143 function, create gain of function alleles, or model human disease mutations  
144 (PICKAR-OLIVER AND GERSBACH 2019). Furthermore, insertions can be used for  
145 gene tagging to detect or manipulate endogenous proteins (VANDEMOORTELE *et al.*  
146 *et al.* 2019). *Drosophila melanogaster* is an excellent model to study gene function  
147 because of its easy genetic manipulation, rich genomic resources, and  
148 conservation of cellular, developmental, and physiological processes with  
149 humans (HALES *et al.* 2015; UGUR *et al.* 2016). Importantly, genome editing tools  
150 involving clustered regularly interspaced short palindromic repeats (CRISPR)  
151 have been successfully applied in *Drosophila* to study gene function (VENKEN *et al.*  
152 *et al.* 2016; KORONA *et al.* 2017; BIER *et al.* 2018).

153

154 Prime editing is a recently developed CRISPR-based tool to engineer precise  
155 edits in the genome (ANZALONE *et al.* 2019). Unlike precise editing using Cas9  
156 and homology-directed repair (HDR), prime editing does not induce double  
157 strand breaks and does not require DNA template containing the edit. In addition,  
158 this method appears to have low off-target effects. Prime editing consists of two  
159 components, 1) a single guide RNA (sgRNA) with a 3' extension encoding the  
160 edit, referred to as a prime editing guide RNA (pegRNA), and 2) a nickase  
161 mutant of Cas9 (nCas9<sup>H840A</sup>) fused with an engineered Moloney murine leukemia  
162 virus (M-MLV) reverse transcriptase (RT) enzyme, referred to as prime editor 2  
163 (PE2). The pegRNA/PE2 complex induces a nick at the target site and reverse  
164 transcribes the edit from the pegRNA into the genome via the RT domain. Like  
165 Cas9/HDR, many types of precise edits are possible with prime editing, such as  
166 single base changes, deletions, or insertions.

167

168 While prime editing was originally developed in human cells (ANZALONE *et al.*  
169 2019), it has been quickly adopted in other organisms including mice (ANZALONE  
170 *et al.* 2019; LIU *et al.* 2020; SURUN *et al.* 2020) and plants (BUTT *et al.* 2020; CHEN  
171 2020; HUA *et al.* 2020; LI *et al.* 2020; LIN *et al.* 2020; TANG *et al.* 2020; VEILLET *et al.*  
172 *et al.* 2020; WANG *et al.* 2020; XU *et al.* 2020). Prime editing has been used to help  
173 correct disease mutations (ANZALONE *et al.* 2019; ROUSSEAU *et al.* 2020),  
174 introduce herbicide resistant alleles (BUTT *et al.* 2020; CHEN 2020; HUA *et al.*  
175 2020; XU *et al.* 2020), alter plant morphology (BUTT *et al.* 2020), and model  
176 human disease mutations in organoids (LIU *et al.* 2020; SCHENE *et al.* 2020).  
177 Adapting and testing prime editing in additional organisms, particularly model  
178 systems, has great potential to improve the study of gene function. Here, we  
179 develop reagents and optimized conditions to conduct prime editing in  
180 *Drosophila*.

181

182 **Results:**

183

184 **Prime editing in cultured S2R+ cells**

185

186 To initially test prime editing in *Drosophila*, we expressed prime editing  
187 components in cultured S2R+ cells by transfection. We used the S2R+ PT5 line  
188 (NEUMULLER *et al.* 2012) that constitutively expresses mCherry fluorescent  
189 protein and which has been previously used for CRISPR/Cas9 genome editing  
190 (VISWANATHA *et al.* 2018). To express PE2 in S2R+ cells, we constructed two  
191 plasmids for constitutive expression. *pAct-PE2* expresses PE2 under the  
192 *Drosophila Actin5c* promoter (Supplemental Figure 1A), and *pUAS-PE2* (Figure  
193 1A) expresses PE2 when used in combination with *pAct-Gal4* (abbreviated as  
194 *pAct>PE2*). This should result in high levels of PE2 expression due to signal  
195 amplification of the Gal4/UAS system (BRAND AND PERRIMON 1993). In addition, to  
196 express pegRNAs in cells, we constructed an empty expression vector (*pCFD3-*  
197 *NS*) that lacks the sgRNA scaffold sequence (NS=No scaffold) (Figure 1B), which  
198 is a modified version of the sgRNA expression plasmid *pCFD3* (PORT *et al.*  
199 2014).

200

201 First, we designed a pegRNA to insert a 23bp barcode (BC) sequence into the  
202 *ebony* gene (Supplemental File 1). This strategy was chosen to enable sensitive  
203 detection of insertion events by PCR. Four days after transfection of PE2 and  
204 pegRNA plasmids into PT5 cells, genomic DNA was collected and insertion-  
205 specific primers were used to amplify the putative insertion (Supplemental Figure  
206 1B). Gel images of PCR products confirmed the presence of the *ebony*<sup>23bpBC</sup>  
207 insertion using either *pAct-PE2* or *pAct>PE2* (Supplemental Figure 1C). To  
208 determine the insertion rate, we performed amplicon sequencing of the target  
209 region from transfected cells. Transfections using *pAct>PE2* resulted in an  
210 insertion efficiency of 0.42%, whereas transfections using *pAct-PE2* were  
211 substantially lower (0.006%) (Supplemental Figure 1D). Although our editing  
212 efficiencies were lower than reported in mammalian cells with an equivalent sized  
213 insertion (ANZALONE *et al.* 2019), these initial results demonstrated that prime  
214 editing was possible in *Drosophila* S2R+ cells.

215

216 Next, we designed a pegRNA to introduce a premature stop codon in *ebony*  
217 (*ebony*<sup>G111X</sup>) (Figure 1C). In addition, we designed an sgRNA that nicks the non-  
218 edited DNA strand, since this approach, known as the Prime Editor 3 (PE3)  
219 system, can bias mismatch repair and boost editing efficiencies in mammalian  
220 cells (MODRICH 2006; CHAKRABORTY AND ALANI 2016; ANZALONE *et al.* 2019). To  
221 simultaneously co-express a pegRNA and sgRNA, we constructed a dual  
222 expression vector called *pCFD5-NS* (Figure 1D). This vector uses tRNA  
223 processing to produce both pegRNA and sgRNA, and is a modified version of the  
224 multiplex sgRNA expression plasmid *pCFD5* (PORT AND BULLOCK 2016).

225

226 After transfecting PT5 cells with *pCFD5-PE3-ebony*<sup>G111X</sup>, *pAct>PE2*, and *pAct-*  
227 *GFP*, we isolated GFP+ cells using FACS and performed amplicon sequencing  
228 from their genomic DNA (Figure 1E). Under these conditions, precise editing  
229 efficiency of *ebony* was 6.0%. Furthermore, by comparing alternate conditions,  
230 we found that editing efficiency was ~2.5x lower without FACS enrichment and

231 ~12x lower using a stable PE2 cell line (*Act-PE2*) (Figure 1E). Like in mammalian  
232 cells (ANZALONE *et al.* 2019), the PE3 system caused a low percentage of  
233 insertions and deletions (indels) (0.86%) (Figure 1F). Finally, we compared  
234 editing efficiency using only a pegRNA (*pCFD3-PE-ebony<sup>G111X</sup>*). Unexpectedly,  
235 editing efficiency was slightly higher (8.4%) without a nicking sgRNA (Figure 1F).  
236 As expected, excluding the sgRNA reduced the frequency of indels to  
237 background levels.

238  
239 To test prime editing at other genomic sites, we designed pegRNAs to introduce  
240 premature stop codons into *white* and *forked* (*white<sup>A134X</sup>* and *forked<sup>D111X</sup>*), along  
241 with sgRNAs to nick on the non-edited strand (Supplemental Figure 1E). Editing  
242 efficiencies using both pegRNA and nicking sgRNA were roughly similar to  
243 *ebony*, producing 2.5% and 6.7% precise editing of *white* and *forked*,  
244 respectively. In addition, results with pegRNA only showed 4.0 and 0.8% precise  
245 editing of *white* and *forked*, respectively. Therefore, unlike *ebony* and *white*,  
246 *forked* editing efficiency was substantially improved by including a nicking  
247 sgRNA. In conclusion, using optimized prime editing conditions, we demonstrate  
248 precise editing efficiencies in S2R+ cells of ~4-8%.

249

## 250 **Prime editing in vivo**

251

252 To test prime editing in vivo, we performed crosses between PE2 and pegRNA  
253 expressing transgenic flies. This strategy has been used with Cas9 (BIER *et al.*  
254 2018), and Cas12a (PORT *et al.* 2020a) to edit somatic and germ cells, and it is  
255 generally associated with higher editing efficiencies than embryo injection. To  
256 express PE2 in vivo, we generated *UAS-PE2* transgenic flies, which express PE2  
257 when crossed with a Gal4 driver line (Figure 2A). In addition, we generated  
258 transgenic flies expressing pegRNAs to introduce premature stop codons into  
259 *ebony*, *white*, and *forked*. These genes/edits were chosen to enable easy  
260 identification of mutant flies with body phenotypes. In addition, transgenic  
261 pegRNA flies were created using the same plasmids validated in S2R+ cells  
262 (*pCFD3-PE-gene<sup>edit</sup>* and *pCFD5-PE3-gene<sup>edit</sup>*).

263

264 Many groups have reported toxicity in *Drosophila* from expression of Cas9  
265 (HUYNH *et al.* 2018; POE *et al.* 2019; PORT *et al.* 2020b) and Cas13 (BUCHMAN *et al.*  
266 2020). To test for toxicity from PE2 expression, we crossed *UAS-PE2* to two  
267 ubiquitous Gal4 drivers (*Act-Gal4* and *tub-Gal4*) and analyzed the resulting  
268 progeny (abbreviated as *Act>PE2* and *tub>PE2*). *Act>PE2* and *tub>PE2* larvae,  
269 pupae, and adults were morphologically normal (not shown). Furthermore, the  
270 observed number of *Act>PE2* and *tub>PE2* adult progeny was similar to negative  
271 control crosses when raised at 25°C or 29°C, and when using two different *UAS-*  
272 *PE2* transgenes (Figure 2B). Finally, *Act>PE2* and *tub>PE2* flies were fertile and  
273 could be propagated as a stock. Therefore, ubiquitous expression of PE2 does  
274 not result in obvious toxicity in flies.

275

276 Next, we crossed *Act>PE2* or *tub>PE2* to transgenic pegRNA lines and analyzed  
277 progeny for evidence of editing in somatic cells (Figure 2C). Crosses involving  
278 expression of a single pegRNA (*pCFD3-PE-gene<sup>edit</sup>*) resulted in progeny that  
279 were wild-type in appearance (Figure 2D, Supplemental Figure 2A). In contrast,  
280 somatic editing using the PE3 system (*pCFD5-PE3-gene<sup>edit</sup>*) resulted in progeny  
281 with mutant phenotypes similar to classical alleles (Figure 2D, Supplemental  
282 Figure 2A). In all cases, mutant phenotypes appeared slightly more severe at  
283 29°C compared to 25°C (not shown). To determine the type and frequency of  
284 DNA changes at target sites, we performed amplicon sequencing from single  
285 adult fly genomic DNA. For *ebony*, *forked*, and *white*, precise editing efficiency  
286 using *Act>PE2* was highest with the PE3 system, resulting in 35.2%, 11.6%, and  
287 21.9% reads, respectively, with the intended edit (Figure 2E). Comparable results  
288 were obtained using *tub>PE2* (Figure 2E). In addition, editing of *ebony* using  
289 *Act>PE2* was higher at 29°C than 25°C, but slightly lower in females compared to  
290 males (Figure 2E). The PE3 system led to a significant percentage of indels at  
291 the target site, with an exceptionally high percentage for *forked* (67.9%). Since  
292 both the precise edit and frameshift indels would cause loss of gene function, our  
293 sequencing results explain the strong mutant phenotypes when using the PE3  
294 system in somatic cells.

295  
296 Adapting prime editing to the germ line could enable the creation and  
297 propagation of edited fly stocks. To accomplish this, we generated transgenic  
298 flies with PE2 under the control of the germ cell-specific *nanos* (*nos*) promoter,  
299 either as a single transgene (*nos-PE2*) (Supplemental Figure 2B), or by  
300 combination of *nos-Gal4* with *UAS-PE2* (*nos>PE2*) (Figure 2A). We crossed *nos-*  
301 *PE2* or *nos>PE2* to *pCFD5-PE3-ebony<sup>G111X</sup>* to generate G1 progeny with editing  
302 components expressed in germ cells (Figure 2F). Next, pools of 10 G1 progeny  
303 were crossed with *ebony<sup>1</sup>* and the percentage of mutant *ebony* G2 progeny  
304 (*ebony<sup>mut</sup>/ebony<sup>1</sup>*) was calculated. Using this assay, we compared *nos-PE2* (two  
305 separate insertions) vs. *nos>PE2*, three temperature conditions (25°C, 29°C, and  
306 29°C with 37°C heat shocks (hs)), and male vs. female germ line editing. We  
307 observed the highest transmission rate (42.2%) of *ebony* mutations from the G1  
308 male germ line using *nos>PE2* and raising G1 animals at 29°C+hs (Figure 2G).  
309 Furthermore, single fly G1 crosses using *nos>PE2* and 29°C+hs produced similar  
310 results to pooled G1 crosses (Figure 2G) and 9/9 (100%) G1 flies were founders  
311 for mutation of *ebony*.

312  
313 Next, we sequenced the *ebony* target site from 72 mutant *ebony* G2 progeny  
314 (Figure 2G). For each single fly G1 cross, the number of mutant *ebony* G2 flies  
315 with a correct edit ranged from 75% to 100% and was similar for male and  
316 female G1 crosses (Figure 2H). Combining sequencing results from all single fly  
317 G1 crosses and both G1 sexes, 63/72 (88.0%) of mutant *ebony* G2 flies had the  
318 desired edit, 7/72 (9.7%) had a frameshift indel, and 2/72 (2.8%) had wild-type  
319 sequence (Figure 2I). Taking the average frequency of mutant *ebony* G2 flies  
320 from single fly G1 crosses (56.2% from G1 males, 26.0% from G1 females) and  
321 multiplying by the frequency of *ebony* mutant flies with the *G111X* edit (88.0%),

322 we estimate that male and female founders on average transmit the desired edit  
323 to 49.5% and 22.9% of progeny, respectively. Finally, homozygous *ebony*<sup>G111X</sup>  
324 flies exhibited dark body pigment (Figure 2J) and could be propagated as a  
325 viable stock (not shown). These results demonstrate that prime editing is  
326 effective for engineering precise genomic edits in the *Drosophila* germ line.  
327

## 328 **Discussion:**

329  
330 Currently, precise genome editing in *Drosophila* is performed by CRISPR/Cas9  
331 and homology directed repair (HDR) (BIER *et al.* 2018). HDR enables a wide  
332 variety of edits, yet is a relatively low-efficiency process, and a number of  
333 unintended side-effects have been documented, such as off-target mutations  
334 (CARROLL 2013), imprecise integration of the donor DNA (SKRYABIN *et al.* 2020),  
335 or genome rearrangement (LEDFORD 2020). In addition, HDR is not as useful for  
336 tissue-specific editing because HDR events only occur in dividing cells.  
337 Furthermore, molecular cloning of donor constructs can be technically  
338 challenging and time-consuming.  
339

340 Prime editing has the potential to address some of these limitations. PE2 uses a  
341 nickase mutant of Cas9 (H840A) that induces single strand breaks, which are  
342 known to decrease undesired genome changes and increase HDR:indel ratios  
343 (MAIZELS AND DAVIS 2018; ANZALONE *et al.* 2019). In addition, prime editing does  
344 not require cell division and functions in post-mitotic cultured cells (ANZALONE *et*  
345 *al.* 2019). pegRNAs contain both targeting sequence and edit template and are  
346 simple to generate, thus facilitating multiple editing experiments in parallel.  
347 Furthermore, transgenic pegRNAs enable temporal and spatial control of precise  
348 editing, similar to transgenic sgRNAs used for CRISPR/Cas9 knockout (KONDO  
349 AND UEDA 2013; PORT *et al.* 2014; MELTZER *et al.* 2019; POE *et al.* 2019; PORT *et*  
350 *al.* 2020a). Generating transgenic pegRNA fly lines takes ~1 month, and thus  
351 delays germ line editing experiments compared to direct injection of genome-  
352 editing components into embryos. Injecting pegRNA plasmids or synthesized  
353 pegRNAs into PE2-expressing embryos, similarly to what is commonly done for  
354 Cas9-based HDR, could speed up the recovery of edited strains, but this  
355 approach remains to be tested for prime editing. One important caveat is that  
356 prime editing is currently limited to small (<100bp) edits that are identified by  
357 molecular assays (e.g. PCR).  
358

359 Precise editing efficiencies in S2R+ cells were ~4x lower than in mammalian  
360 cells, and nicking sgRNAs (PE3 system) did not always increase efficiency. It is  
361 not clear if this is due to biological differences (e.g. DNA repair pathways) or  
362 technical differences (e.g. transfection method, promoter use, temperature)  
363 between these two culture systems. Further optimization of prime editing will  
364 likely improve its efficiency in cultured *Drosophila* cells. Regardless, our results  
365 suggest that prime editing can be used as a tool to generate edited S2R+ cells  
366 lines. Furthermore, pegRNAs could be stably integrated in S2R+ cells and used



367 for pooled screening, as has been done with Cas9/sgRNAs (VISWANATHA *et al.*  
368 2018).

369  
370 Ubiquitous PE2 and pegRNA expression in whole animals led to editing  
371 efficiencies of 10-40% for *ebony*, *white*, and *forked*. Although nicking sgRNAs led  
372 to higher editing frequencies, they also caused frequent indels (26-68%), which  
373 presumably contributed to the robust loss of function phenotypes we observed.  
374 Conversely, single pegRNAs did not cause obvious mutant phenotypes despite  
375 evidence of precise editing (4-26%). Therefore, unlike existing transgenic  
376 crossing techniques for somatic knockout (PORT *et al.* 2014; PORT AND BULLOCK  
377 2016; MELTZER *et al.* 2019; POE *et al.* 2019; PORT *et al.* 2020a; PORT *et al.*  
378 2020b), we were unable to install a precise edit in the majority of cells in the fly  
379 using ubiquitous expression of prime editing components. Nevertheless, some  
380 applications may be compatible with our reported somatic editing efficiencies,  
381 such as screening edits that drive tumorigenesis or affect cell competition.  
382

383 By restricting expression of PE2 to germ cells, we demonstrated efficient  
384 transmission of a precise edit (*ebony*<sup>G111X</sup>) from transgenic founder flies to  
385 progeny. 100% of founder flies transmitted the *ebony*<sup>G111X</sup> edit, with 49.5% of  
386 progeny from male founders inheriting the allele. This transmission rate is  
387 comparable to, if not higher than, using HDR and embryo injection to install  
388 similarly sized edits (GRATZ *et al.* 2014; PORT *et al.* 2014; GE *et al.* 2016; LEVI *et al.*  
389 2020) and facilitates molecular screening of a small number of progeny.  
390 Similar to S2R+ and somatic cells, transmission rate was increased using  
391 Gal4/UAS-based PE2 expression and higher temperature, respectively. Further  
392 manipulating this temperature sensitivity will be useful to optimize germ cell  
393 editing. It will also be important to determine the generality of this method by test  
394 editing of additional genes, especially essential genes.  
395

396 Currently, designing an effective pegRNA for precise editing is less  
397 straightforward than for sgRNAs. We deliberately selected pegRNA spacer  
398 sequences based on previously validated sgRNAs (see methods), but this might  
399 have led to better than average editing efficiency. The recent introduction of  
400 online tools have made pegRNA design easier, with options to optimize GC  
401 content and RNA stability (CHOW *et al.* 2020; Hsu *et al.* 2020). When possible,  
402 we recommend testing editing efficiency in S2R+ cells before proceeding in vivo.  
403 While amplicon sequencing produces high quality quantitative data, there are  
404 faster and cheaper molecular assays such as the Dinucleotide signaTurE  
405 CapTure (DTECT) (BILLON *et al.* 2020) or Tracking of Indels by Decomposition  
406 (TIDE) (SENTMANAT *et al.* 2018).  
407

408 In summary, we have developed genetic tools to express prime editing  
409 components in *Drosophila*, and optimized conditions for efficient editing in  
410 cultured cells and in vivo. By designing/cloning a pegRNA and optional sgRNA,  
411 *Drosophila* researchers can generate a wide variety of precise genome  
412 modifications such as point mutations, epitope tag insertions, or deletions.

413 Furthermore, the ability to use prime editing in the fly germ line makes it useful to  
414 create custom fly strains for gene function analysis. Since CRISPR-based tools  
415 are continually engineered for optimal efficiency or new functions, it is likely that  
416 future variant prime editor systems will improve this method in *Drosophila*.  
417 Finally, the tools and optimized conditions we developed for prime editing in  
418 *Drosophila* may be useful in other model organisms.

#### 419 420 **Acknowledgements:**

421  
422 We thank Rich Binari for general lab assistance and help with fly genetics  
423 (particularly during the COVID-19 shutdown), TRiP and DRSC for help  
424 generating transgenic flies, Ram Viswanatha for sharing unpublished reagents  
425 and general discussions, Gillian Millburn for discussions on pegRNA transgene  
426 nomenclature, Cathryn King for general lab assistance, Cooper Cavers for help  
427 isolating transgenic flies, Jordan Rabasco for help with molecular cloning, and  
428 Ben Ewen-Campen, Jonathan Zirin, and Thai LaGraff for comments on the  
429 manuscript. J.A.B. was supported by the Damon Runyon Foundation and the  
430 “Training Grant in Genetics” T32 Ruth Kirschstein-NRSA institutional research  
431 training grant funded through the NIH/NIGMS. This work was also supported by  
432 NIH grants R24OD01984, R24OD030002 and P41GM132087. N.P. is an  
433 investigator of the Howard Hughes Medical Institute.

#### 434 435 **Author contributions:**

436  
437 Conceptualization and methodology, J.A.B.; Formal analysis J.A.B. and G.B.;  
438 Investigation, J.A.B. and G.B.; Writing – Original Draft, J.A.B.; Writing – Review &  
439 Editing, J.A.B., G.B., N.P.; Visualization, J.A.B.; Supervision, J.A.B., N.P.;  
440 Funding acquisition, J.A.B., N.P.

#### 441 442 **Methods:**

##### 443 444 **pegRNA and sgRNA design**

445  
446 pegRNA spacer sequences were selected based on previously validated sgRNA  
447 target sites for *ebony* (PORT *et al.* 2015), *white* (KONDO AND UEDA 2013), and  
448 *forked* (PORT AND BULLOCK 2016). 13bp was used for the pegRNA prime binding  
449 site (PBS). For the reverse transcribed (RT) region, we used either a 34bp  
450 (*ebony*<sup>23bpBC</sup>) or 18bp (*ebony*<sup>G111X</sup>, *white*<sup>A134X</sup>, *forked*<sup>D111X</sup>) region. In all of our  
451 pegRNA designs, the pegRNA PAM is disrupted by the edit. Nicking sgRNAs  
452 were designed to nick the DNA strand opposite to the pegRNA-nicked strand  
453 within 40-90 bp of the pegRNA nick (*ebony*<sup>G111X</sup>: +57, *white*<sup>A134X</sup>: +70,  
454 *forked*<sup>D111X</sup>: +57). See Supplemental File 1 for pegRNA and sgRNA sequences.  
455 See Supplemental File 3 for additional pegRNA and sgRNA design parameters.

##### 456 457 **Plasmid cloning**

458

459 Plasmid DNAs were constructed and propagated using standard protocols as  
460 follows. PCR fragments were amplified using Phusion polymerase (New England  
461 Biolabs M0530). Plasmids were digested with restriction enzymes at 37°C for 2-  
462 16hrs. Linearized plasmid and PCR fragments were gel purified using QIAquick  
463 columns (28115, Qiagen). Inserts and backbones were assembled using Gibson  
464 assembly (New England Biolabs E2611) or T4 ligation (New England Biolabs  
465 M0202). Gateway-compatible expression and entry vectors were recombined  
466 using LR Clonase II (ThermoFisher Scientific 11791020). Chemically competent  
467 TOP10 *E.coli*. (Invitrogen, C404010) were transformed with plasmids containing  
468 either Ampicillin or Kanamycin resistance genes and were selected on LB-Agar  
469 plates with 100µg/ml Ampicillin or 50µg/ml Kanamycin. *ccdB* resistant chemically  
470 competent *E.coli* (Invitrogen, A10460) were transformed with plasmids containing  
471 a Gateway cassette (*ccdB*, Chlor.R.) and were selected on LB-Agar plates with  
472 100µg/ml Ampicillin and colonies grown with 100µg/ml Ampicillin and 20µg/ml  
473 Chloramphenicol. Plasmid DNA was isolated from bacterial cultures using  
474 QIAprep Spin Miniprep Kit (Qiagen 27104) and Sanger sequenced at the  
475 DF/HCC DNA Resource Core or GeneWiz. Oligo and dsDNA sequences are  
476 listed in Supplemental File 2.

477  
478 *pCFD3-NS* (Addgene #149545): *pCFD3* (Addgene #49410) (PORT *et al.* 2014)  
479 was digested with BbsI (Fermentas ER1011) and XbaI (New England Biolabs  
480 R0145), which removes the sgRNA scaffold and *Drosophila U6* downstream  
481 region, and the backbone was purified using a QIAquick column (28115,  
482 Qiagen). A gBlock (IDT) containing two BbsI sites and the *U6* downstream region  
483 was inserted into digested *pCFD3* backbone by Gibson assembly.

484  
485 *pCFD5-NS* (Addgene #149546): *pCFD5* (Addgene #73914) (PORT AND BULLOCK  
486 2016) was digested with BbsI (Fermentas ER1011) and XbaI (New England  
487 Biolabs R0145), which removes the sgRNA scaffold, *O.s.* Gly tRNA, sgRNA  
488 scaffold, and *U6* downstream region. The backbone was purified using a  
489 QIAquick column (28115, Qiagen). A gBlock (IDT) containing two BbsI sites and  
490 the *U6* downstream region was inserted into the digested *pCFD5* backbone by  
491 Gibson assembly. The *D.m.* Gly tRNA sequence remains 5' to the first BbsI site.

492  
493 *pEntr\_PE2* (Addgene #149548): *PE2* coding sequence was PCR amplified from  
494 *pCMV-PE2* (Addgene # 132775). *pEntr* backbone was PCR amplified from  
495 *pEntr\_D-TOPO* (Invitrogen K240020). *PE2* coding sequence was cloned into  
496 *pEntr* backbone by Gibson assembly.

497  
498 *pNos-PE2-attB* (Addgene #149549): *PE2* coding sequence was PCR amplified  
499 from *pCMV-PE2* (Addgene # 132775) and gel purified. *pNos-Cas9-attB* (REN *et*  
500 *al.* 2013) was digested with XbaI/AvrII (New England Biolabs R0145, R0174) to  
501 remove Cas9 sequences and the backbone fragment was gel purified. *PE2*  
502 coding sequence was inserted into digested *pNos-attB* by Gibson assembly.

503

504 *pAct-GW-HygroR* (Addgene #149610): *Act5c* promoter was amplified from *pAWF*  
505 (Murphy lab, unpublished, [https://emb.carnegiescience.edu/drosophila-gateway-](https://emb.carnegiescience.edu/drosophila-gateway-vector-collection)  
506 vector-collection) and gel purified. Backbone was PCR amplified from *pMK33-*  
507 *GW*, using primers that exclude the *Metallothionein* promoter, and gel purified.  
508 The *Act5c* fragment was inserted into the *pMK33-GW* backbone by Gibson  
509 assembly.

510  
511 *pUAS-PE2-attB* (Addgene #149550) and *pAct-PE2-HygroR* (Addgene #149552)  
512 were generated by Gateway reactions between *pEntr\_PE2* and *pWalium10-roe*  
513 (PERKINS *et al.* 2015) or *pAct-GW-HygroR*, respectively.

514  
515 To clone the *pCFD3-PE-ebony*<sup>23bpBC</sup> expression plasmid, oligos encoding the  
516 spacer, scaffold, and extension were inserted into *pCFD3-NS* by ligation. Briefly,  
517 *pCFD3-NS* was digested with BbsI and purified on a QIAquick column. Top and  
518 bottom oligo pairs encoding either the spacer, scaffold, or extension sequence  
519 (Supplemental File 2) were designed such that they had overlapping sticky ends  
520 with each other and digested *pCFD3-NS*. Oligo pairs were separately annealed  
521 and all were ligated into digested *pCFD3-NS* using T4 ligase (NEB, M0202). See  
522 Supplemental File 3 for detailed cloning protocols.

523  
524 To clone *pCFD3-PE-ebony*<sup>G111X</sup>, *pCFD3-PE-white*<sup>A134X</sup>, and *pCFD3-PE-*  
525 *forked*<sup>D111X</sup>, gBlock (IDT) dsDNA fragments encoding the entire pegRNA were  
526 inserted into *pCFD3-NS* by Gibson assembly. Briefly, *pCFD3-NS* was digested  
527 with BbsI and purified on a QIAquick column. gBlock fragments were designed  
528 such that the pegRNA sequence was flanked by sequence homologous to  
529 digested *pCFD3-NS* (Supplemental File 2). For each gene target, a gBlock was  
530 inserted into digested *pCFD3-NS* by Gibson assembly. See Supplemental File 3  
531 for detailed cloning protocols.

532  
533 To clone *pCFD5-PE3-ebony*<sup>G111X</sup>, *pCFD5-PE3-white*<sup>A134X</sup>, and *pCFD5-PE3-*  
534 *forked*<sup>D111X</sup>, two overlapping gBlock (IDT) dsDNA fragments encoding the  
535 pegRNA and nicking sgRNA were inserted into *pCFD5-NS* by Gibson assembly.  
536 Briefly, *pCFD5-NS* was digested with BbsI and purified on a QIAquick column.  
537 gBlock #1 encoded the sgRNA sequence flanked by sequence homologous to  
538 *pCFD5-NS* and a partial sequence encoding the O.s. Gly tRNA, and gBlock #2  
539 encoded the pegRNA flanked by the O.s. Gly tRNA and sequence homologous  
540 to *pCFD5-NS* (Supplemental File 2). For each gene target, gBlocks #1&2 were  
541 inserted together into digested *pCFD5-NS* by Gibson assembly. See  
542 Supplemental File 3 for detailed cloning protocols.

543

## 544 Cell culture

545

546 *Drosophila* S2R+ cells were cultured at 25°C using Schneider's media (21720-  
547 024, ThermoFisher) with 10% FBS (A3912, Sigma) and 50 U/ml penicillin-  
548 streptomycin (15070-063, ThermoFisher). S2R+ cells were transfected using  
549 Effectene (301427, Qiagen) following the manufacturer's instructions.

550

551 S2R+ cells stably expressing PE2 (PT5-PE2) were generated by transfecting  
552 *pAct-PE2-HygroR* into the PT5 line (NEUMULLER *et al.* 2012), which expresses a  
553 mCherry-Clic protein trap. PT5 cells were transfected in a 6-well dish at a  
554 concentration of  $1.8 \times 10^6$  cells/ml (2ml total volume). 24 hours after transfection,  
555 200  $\mu$ g/ml Hygromycin B (Calbiochem 400051-1MU) was added to the media. 5  
556 days after transfection, cells were resuspended and transferred to a T75 flask  
557 with fresh media containing 200  $\mu$ g/ml Hygromycin B. 1 week later, cells were  
558 resuspended, centrifuged at 100g for 10min, and resuspended in 3ml fresh  
559 media containing 200  $\mu$ g/ml Hygromycin B. Resuspended cells were transferred  
560 serially into each well of a 6-well plate as a dilution series. Visible colonies were  
561 resuspended and expanded after ~3 weeks.

562

563 Plasmids were transfected into PT5 or PT5-PE2 cells. Briefly, PT5 or PT5-PE2  
564 cells were seeded at 600,000 cells/well of a 24-well plate and transfected with a  
565 total of 200 ng plasmid DNA. PT5 cells were transfected with *pAct-Gal4*  
566 (unpublished, Dr. Y. Hiromi, National Institute of Genetics, Mishima, Japan),  
567 *pUAS-PE2*, pegRNA plasmid, and *pAct-GFP* (aka pLib6.6, unpublished) at a  
568 3:3:3:1 ratio. PT5-PE2 cells were transfected with pegRNA plasmid and *pAct-*  
569 *GFP* at a 3:1 ratio. To increase the chances that GFP+ cells contained prime  
570 editing plasmids, we transfected less *pAct-GFP* plasmid relative to the other co-  
571 transfected plasmids.

572

573 4 days after transfection, GFP+ cells were isolated by fluorescence-activated cell  
574 sorting (FACS). Cells were first resuspended in culture media and pipetted into a  
575 cell straining FACS tube (352235 Corning) to break up cell clump. 50,000 cells  
576 with GFP fluorescence in the 60-80<sup>th</sup> percentile of fluorescence intensity were  
577 sorted on an Aria 561 instrument into a single well of a 96-well plate and  
578 incubated at 25°C for 24hr.

579

580 5 days after transfection, genomic DNA was isolated from sorted and non-sorted  
581 cells using the QuickExtract reagent (Lucigen QE09050). In addition, genomic  
582 DNA was isolated from non-transfected PT5 cells as a negative control. Briefly,  
583 culture media was removed and replaced with the same volume of QuickExtract  
584 reagent. The solution was resuspended by pipetting, transferred to a PCR strip  
585 tube, incubated at 65°C for 15min, and then 98°C for 2min.

586

## 587 **Fly culture and crosses**

588

589 Flies were maintained on standard fly food at 25°C, or at 29°C when noted. Fly  
590 stocks were obtained from individual labs or the Bloomington Drosophila Stock  
591 Center (BDSC) (indicated with BL#). Stocks used in this study are as follows: *yw*  
592 (Perrimon Lab), *yw*; *Sp hs-hid/CyO* (derived from BL7757), *yw*; *TM3,Sb/TM6, Tb*  
593 (Perrimon Lab), *ywf* (BL1493), *yv nos-phiC31int*; *attP40* (BL25709), *yv nos-*  
594 *phiC31int*; *attP2* (BL25710), *yw*; *tub-Gal4* (BL5138), *yw*; *Act-Gal4* (BL4414), *yw*;  
595 *nos-Gal4* (BL4442), *UAS-emptyVK37* (Bellen lab).

596

597 Transgenic flies generated in this study (submitted to the BDSC):

598

599 *yw; UAS-PE2, w+ attP40* (BL#XXXXXX)

600 *yw;; UAS-PE2, w+ attP2* (BL#XXXXXX)

601 *yv; pCFD3-PE-ebony<sup>G111X</sup>, v+ attP40* (BL#XXXXXX)

602 *yv; pCFD3-PE-white<sup>A134X</sup>, v+ attP40* (BL#XXXXXX)

603 *yv; pCFD3-PE-forked<sup>D111X</sup>, v+ attP40* (BL#XXXXXX)

604 *yv; pCFD5-PE3-ebony<sup>G111X</sup>, v+ attP40* (BL#XXXXXX)

605 *yv; pCFD5-PE3-white<sup>A134X</sup>, v+ attP40* (BL#XXXXXX)

606 *yv; pCFD5-PE3-forked<sup>D111X</sup>, v+ attP40* (BL#XXXXXX)

607 *yscv; nos-PE2, v+ attP40*

608 *yv;; nos-PE2, v+ attP2*

609

610 Fly stocks with multiple transgenes (submitted to the BDSC):

611

612 *w; Act-Gal4/CyO; UAS-PE2, w+ attP2* (BL#XXXXXX)

613 *w; UAS-PE2, w+ attP40; Tub-Gal4/TM6b* (BL#XXXXXX)

614 *w; nos-Gal4; UAS-PE2, w+ attP2* (BL#XXXXXX)

615

616 Transgenic flies were generated by phiC31 integration of attB-containing  
617 plasmids into either attP40 or attP2 landing sites. Briefly, plasmid DNA was  
618 purified twice on QIAquick columns and eluted in injection buffer (100 µM  
619 NaPO<sub>4</sub>, 5 mM KCl), at a concentration of 200 ng/µl. Plasmid DNA was injected  
620 into ~50 fertilized embryos (*yv nos-phiC31int; attP40* or *yv nos-phiC31int;; attP2*)  
621 and resulting progeny were outcrossed to screen for transgenic founder progeny.  
622 *nos-PE2* and pegRNA insertions were isolated by screening for *vermillion+* eye  
623 color. *UAS-PE2* insertions were isolated by screening for *white+* eye color.

624

625 For PE2 toxicity experiments, *Act-Gal4/CyO* or *tub-Gal4/TM3-Sb* was crossed  
626 with either *UAS-empty* (ChrII), *UAS-PE2* (ChrII), or *UAS-PE2* (ChrIII) and  
627 progeny were raised at either 25°C or 29°C starting at egg deposition. The  
628 frequency of PE2 expressing progeny was determined by counting the number of  
629 adult non-balancer progeny and dividing by the total number of flies (# non-  
630 balancer/# non-balancer + # balancer).

631

632 For somatic editing experiments, *Act>PE2* or *tub>PE2* flies were crossed with  
633 pegRNA flies and adult PE2/pegRNA progeny analyzed for mutant phenotypes.

634

635 For germ line editing experiments, *nos-PE2* or *nos>PE2* flies were crossed with  
636 *pCFD5-PE3-e<sup>G111X</sup>* flies and G1 progeny were crossed with *TM3,e<sup>1</sup>/TM6b,e<sup>1</sup>*. To  
637 screen different germ cell PE2 genotypes and temperature conditions, G1  
638 crosses were performed as pools of 10 PE2/pegRNA males or females. G1  
639 crosses were performed as single PE2/pegRNA male or female crosses for  
640 optimal conditions (*nos>PE2*, 29°C + h.s.). The phenotypes of G2 progeny were  
641 scored as either wild-type or *ebony* (dark cuticle pigment) on a fly dissecting

642 scope. To heat shock G1 larvae, we incubated larvae at 37°C for 1hr in five  
643 separate treatments after egg deposition: 24hr, 48hr, 72hr, 96hr, and 120hr.

644  
645 Focal stack images of adult flies were obtained using a Zeiss Axio Zoom V16  
646 fluorescence microscope and merged using Helicon Focus 7. Images were then  
647 processed using Adobe Photoshop CS6.

648  
649 Fly genomic DNA was isolated by grinding a single fly in 50µl squishing buffer  
650 (10 mM Tris-Cl pH 8.2, 1 mM EDTA, 25 mM NaCl) with 200µg/ml Proteinase K  
651 (3115879001, Roche), incubating at 37°C for 30 min, and 95°C for 2 minutes. For  
652 somatic editing experiments, genomic DNA was collected from adult male flies  
653 unless otherwise noted. For germ line editing experiments, genomic DNA was  
654 collected from both male and female G2 adult flies.

655

### 656 **Amplicon sequencing**

657

658 Genomic edit sites were amplified by PCR to yield amplicons for NGS. Briefly,  
659 1µl of S2R+ or fly genomic DNA was used in a PCR reaction using Q5 High-  
660 Fidelity DNA Polymerase (NEB M0491L). Primer pairs (Supplemental File 2)  
661 were designed to yield amplicons ~200-280 bp in size with the intended editing  
662 site located within 100 bp of either the forward or reverse primer. PCR fragments  
663 were purified using QIAquick columns (28115, Qiagen) and submitted to the  
664 MGH CCIB DNA Core (CRISPR Sequencing), or Genewiz (Amplicon-EZ).

665

666 NGS reads were analyzed using CRISPResso2 (version 2.0.38) (CLEMENT *et al.*  
667 2019). To calculate the percent of reads with the precise edit, we used the  
668 following parameters: "--prime\_editing\_pegRNA\_spacer\_seq", "--  
669 prime\_editing\_pegRNA\_extension\_seq", "--  
670 prime\_editing\_pegRNA\_scaffold\_sequence", "--ignore\_substitutions", and "--  
671 discard\_indel\_reads". The precise editing frequency was calculated from  
672 "CRISPResso2\_quantification\_of\_editing\_frequency.txt", for the "Prime-edited"  
673 amplicon, as the # unmodified/reads aligned all amplicons. To determine the  
674 percent of reads with indels, we ran CRISPResso2 with standard settings and  
675 the --ignore\_substitutions parameter. The indel frequency was calculated from  
676 "CRISPResso2\_quantification\_of\_editing\_frequency.txt", as the # modified/#  
677 reads\_aligned.

678

679 For S2R+ and fly experiments involving the edits *ebony*<sup>G111X</sup>, *white*<sup>A134X</sup>,  
680 *forked*<sup>D111X</sup>, we specified a quantification window ("-qwc") that encompasses the  
681 region between the pegRNA and nicking sgRNA (spanning the -6 position  
682 relative to the pegRNA PAM to the -6 position relative to the sgRNA PAM)  
683 (*ebony*: 96-158; *forked*: 97-159; *white*: 112-187).

684

685 Fastq files containing amplicon reads will be deposited at the NCBI SRA.

686

687 **References:**

688

- 689 Anzalone, A. V., P. B. Randolph, J. R. Davis, A. A. Sousa, L. W. Koblan *et al.*, 2019  
690 Search-and-replace genome editing without double-strand breaks or donor  
691 DNA. *Nature* 576: 149-157.
- 692 Bier, E., M. M. Harrison, K. M. O'Connor-Giles and J. Wildonger, 2018 *Advances in*  
693 *Engineering the Fly Genome with the CRISPR-Cas System. Genetics* 208: 1-18.
- 694 Billon, P., T. S. Nambiar, S. B. Hayward, M. P. Zafra, E. M. Schatoff *et al.*, 2020  
695 Detection of Marker-Free Precision Genome Editing and Genetic Variation  
696 through the Capture of Genomic Signatures. *Cell Rep* 30: 3280-3295 e3286.
- 697 Brand, A. H., and N. Perrimon, 1993 Targeted gene expression as a means of altering  
698 cell fates and generating dominant phenotypes. *Development* 118: 401-415.
- 699 Buchman, A. B., D. J. Brogan, R. Sun, T. Yang, P. D. Hsu *et al.*, 2020 Programmable  
700 RNA Targeting Using CasRx in Flies. *CRISPR J* 3: 164-176.
- 701 Butt, H., G. S. Rao, K. Sedeek, R. Aman, R. Kamel *et al.*, 2020 Engineering herbicide  
702 resistance via prime editing in rice. *Plant Biotechnol J.*
- 703 Carroll, D., 2013 Staying on target with CRISPR-Cas. *Nat Biotechnol* 31: 807-809.
- 704 Chakraborty, U., and E. Alani, 2016 Understanding how mismatch repair proteins  
705 participate in the repair/anti-recombination decision. *FEMS Yeast Res* 16.
- 706 Chen, Q.-J., 2020 Prime editing efficiently generates W542L and S621I double  
707 mutations in two ALS genes of maize. *bioRxiv*.
- 708 Chow, R. D., J. S. Chen, J. Shen and S. Chen, 2020 pegFinder: A pegRNA designer for  
709 CRISPR prime editing. *bioRxiv*.
- 710 Clement, K., H. Rees, M. C. Canver, J. M. Gehrke, R. Farouni *et al.*, 2019 CRISPResso2  
711 provides accurate and rapid genome editing sequence analysis. *Nat*  
712 *Biotechnol* 37: 224-226.
- 713 Ge, D. T., C. Tipping, M. H. Brodsky and P. D. Zamore, 2016 Rapid Screening for  
714 CRISPR-Directed Editing of the *Drosophila* Genome Using white  
715 Coconversion. *G3 (Bethesda)* 6: 3197-3206.
- 716 Gratz, S. J., F. P. Ukken, C. D. Rubinstein, G. Thiede, L. K. Donohue *et al.*, 2014 Highly  
717 specific and efficient CRISPR/Cas9-catalyzed homology-directed repair in  
718 *Drosophila*. *Genetics* 196: 961-971.
- 719 Hales, K. G., C. A. Korey, A. M. Larracuenta and D. M. Roberts, 2015 *Genetics on the*  
720 *Fly: A Primer on the Drosophila Model System. Genetics* 201: 815-842.
- 721 Hsu, J. Y., A. V. Anzalone, J. Grünwald, K. C. Lam, M. W. Shen *et al.*, 2020 PrimeDesign  
722 software for rapid and simplified design of prime editing guide RNAs.  
723 *bioRxiv*.
- 724 Hua, K., Y. Jiang, X. Tao and J. K. Zhu, 2020 Precision genome engineering in rice  
725 using prime editing system. *Plant Biotechnol J.*
- 726 Huynh, N., J. Zeng, W. Liu and K. King-Jones, 2018 A *Drosophila* CRISPR/Cas9 Toolkit  
727 for Conditionally Manipulating Gene Expression in the Prothoracic Gland as a  
728 Test Case for Polytene Tissues. *G3 (Bethesda)* 8: 3593-3605.
- 729 Kondo, S., and R. Ueda, 2013 Highly improved gene targeting by germline-specific  
730 Cas9 expression in *Drosophila*. *Genetics* 195: 715-721.
- 731 Korona, D., S. A. Koestler and S. Russell, 2017 Engineering the *Drosophila* Genome  
732 for Developmental Biology. *J Dev Biol* 5.



- 733 Ledford, H., 2020 CRISPR gene editing in human embryos wreaks chromosomal  
734 mayhem. *Nature* 583: 17-18.
- 735 Levi, T., A. Sloutskin, R. Kalifa, T. Juven-Gershon and O. Gerlitz, 2020 Efficient In Vivo  
736 Introduction of Point Mutations Using ssODN and a Co-CRISPR Approach.  
737 *Biol Proced Online* 22: 14.
- 738 Li, H., J. Li, J. Chen, L. Yan and L. Xia, 2020 Precise Modifications of Both Exogenous  
739 and Endogenous Genes in Rice by Prime Editing. *Mol Plant* 13: 671-674.
- 740 Lin, Q., Y. Zong, C. Xue, S. Wang, S. Jin *et al.*, 2020 Prime genome editing in rice and  
741 wheat. *Nat Biotechnol* 38: 582-585.
- 742 Liu, Y., X. Li, S. He, S. Huang, C. Li *et al.*, 2020 Efficient generation of mouse models  
743 with the prime editing system. *Cell Discov* 6: 27.
- 744 Maizels, N., and L. Davis, 2018 Initiation of homologous recombination at DNA nicks.  
745 *Nucleic Acids Res* 46: 6962-6973.
- 746 Meltzer, H., E. Marom, I. Alyagor, O. Maysel, V. Berkun *et al.*, 2019 Tissue-specific  
747 (ts)CRISPR as an efficient strategy for in vivo screening in *Drosophila*. *Nat*  
748 *Commun* 10: 2113.
- 749 Modrich, P., 2006 Mechanisms in eukaryotic mismatch repair. *J Biol Chem* 281:  
750 30305-30309.
- 751 Neumuller, R. A., F. Wirtz-Peitz, S. Lee, Y. Kwon, M. Buckner *et al.*, 2012 Stringent  
752 analysis of gene function and protein-protein interactions using fluorescently  
753 tagged genes. *Genetics* 190: 931-940.
- 754 Perkins, L. A., L. Holderbaum, R. Tao, Y. Hu, R. Sopko *et al.*, 2015 The Transgenic  
755 RNAi Project at Harvard Medical School: Resources and Validation. *Genetics*  
756 201: 843-852.
- 757 Pickar-Oliver, A., and C. A. Gersbach, 2019 The next generation of CRISPR-Cas  
758 technologies and applications. *Nat Rev Mol Cell Biol* 20: 490-507.
- 759 Poe, A. R., B. Wang, M. L. Sapar, H. Ji, K. Li *et al.*, 2019 Robust CRISPR/Cas9-Mediated  
760 Tissue-Specific Mutagenesis Reveals Gene Redundancy and Perdurance in  
761 *Drosophila*. *Genetics* 211: 459-472.
- 762 Port, F., and S. L. Bullock, 2016 Augmenting CRISPR applications in *Drosophila* with  
763 tRNA-flanked sgRNAs. *Nat Methods* 13: 852-854.
- 764 Port, F., H. M. Chen, T. Lee and S. L. Bullock, 2014 Optimized CRISPR/Cas tools for  
765 efficient germline and somatic genome engineering in *Drosophila*. *Proc Natl*  
766 *Acad Sci U S A* 111: E2967-2976.
- 767 Port, F., N. Muschalik and S. L. Bullock, 2015 Systematic Evaluation of *Drosophila*  
768 CRISPR Tools Reveals Safe and Robust Alternatives to Autonomous Gene  
769 Drives in Basic Research. *G3 (Bethesda)* 5: 1493-1502.
- 770 Port, F., M. Starostecka and M. Boutros, 2020a Multiplexed conditional genome  
771 editing with Cas12a in *Drosophila*. *bioRxiv*.
- 772 Port, F., C. Strein, M. Stricker, B. Rauscher, F. Heigwer *et al.*, 2020b A large-scale  
773 resource for tissue-specific CRISPR mutagenesis in *Drosophila*. *Elife* 9.
- 774 Ren, X., J. Sun, B. E. Housden, Y. Hu, C. Roesel *et al.*, 2013 Optimized gene editing  
775 technology for *Drosophila melanogaster* using germ line-specific Cas9. *Proc*  
776 *Natl Acad Sci U S A* 110: 19012-19017.

- 777 Rousseau, J., C. H. Mbakam, A. Guyon, G. Tremblay, F. G. Begin *et al.*, 2020 Specific  
778 mutations in genes responsible for Alzheimer and for Duchenne Muscular  
779 Dystrophy introduced by Base editing and PRIME editing. bioRxiv.
- 780 Schene, I. F., I. P. Joore, M. Mokry, A. H. M. van Vugt, P. M. van Hasselt *et al.*, 2020  
781 Prime editing for functional repair in patient-derived disease models.  
782 bioRxiv.
- 783 Sentmanat, M. F., S. T. Peters, C. P. Florian, J. P. Connelly and S. M. Pruett-Miller, 2018  
784 A Survey of Validation Strategies for CRISPR-Cas9 Editing. *Sci Rep* 8: 888.
- 785 Skryabin, B. V., D. M. Kummerfeld, L. Gubar, B. Seeger, H. Kaiser *et al.*, 2020  
786 Pervasive head-to-tail insertions of DNA templates mask desired CRISPR-  
787 Cas9-mediated genome editing events. *Sci Adv* 6: eaax2941.
- 788 Surun, D., A. Schneider, J. Mircetic, K. Neumann, F. Lansing *et al.*, 2020 Efficient  
789 Generation and Correction of Mutations in Human iPS Cells Utilizing mRNAs  
790 of CRISPR Base Editors and Prime Editors. *Genes (Basel)* 11.
- 791 Tang, X., S. Sretenovic, Q. Ren, X. Jia, M. Li *et al.*, 2020 Plant Prime Editors Enable  
792 Precise Gene Editing in Rice Cells. *Mol Plant* 13: 667-670.
- 793 Ugur, B., K. Chen and H. J. Bellen, 2016 *Drosophila* tools and assays for the study of  
794 human diseases. *Dis Model Mech* 9: 235-244.
- 795 Vandemoortele, G., S. Eyckerman and K. Gevaert, 2019 Pick a Tag and Explore the  
796 Functions of Your Pet Protein. *Trends Biotechnol* 37: 1078-1090.
- 797 Veillet, F., M.-P. Kermarrec, L. Chauvin, A. Guyon-Debast, J.-E. Chauvin *et al.*, 2020  
798 Prime editing is achievable in the tetraploid potato, but needs improvement.  
799 bioRxiv.
- 800 Venken, K. J., A. Sarrion-Perdigones, P. J. Vandeventer, N. S. Abel, A. E. Christiansen *et*  
801 *al.*, 2016 Genome engineering: *Drosophila melanogaster* and beyond. *Wiley*  
802 *Interdiscip Rev Dev Biol* 5: 233-267.
- 803 Viswanatha, R., Z. Li, Y. Hu and N. Perrimon, 2018 Pooled genome-wide CRISPR  
804 screening for basal and context-specific fitness gene essentiality in  
805 *Drosophila* cells. *Elife* 7.
- 806 Wang, L., H. B. Kaya, N. Zhang, R. Rai, M. R. Willmann *et al.*, 2020 Spelling changes  
807 and fluorescent tagging with prime editing vectors for plants. bioRxiv.
- 808 Xu, W., C. Zhang, Y. Yang, S. Zhao, G. Kang *et al.*, 2020 Versatile Nucleotides  
809 Substitution in Plant Using an Improved Prime Editing System. *Mol Plant* 13:  
810 675-678.

811

## 812 **Figure legends:**

813

814 **Figure 1. Prime editing in cultured S2R+ cells. A.** Diagram of PE2 expression  
815 plasmid *pUAS-PE2*. *UAS*, *Upstream activating sequence*; *NLS*, Nuclear  
816 localization sequence; *SV40*, 3' UTR; *w+*, *white+* rescue transgene; *attB*, *phiC31*  
817 recombination site. **B.** Diagram of *pCFD3-NS* pegRNA expression plasmid. *BbsI*  
818 sites indicate cloning site for pegRNA encoding sequence. *dU6:3*, *U6* promoter;  
819 *U6 3'*, *U6* downstream region; *v+*, *vermillion+* rescue transgene. **C.** *ebony*  
820 genomic region showing target site and installed edit (*ebony*<sup>G111X</sup>). **D.** Dual  
821 sgRNA and pegRNA expression plasmid *pCFD5-NS*. tRNA, *D.m.* and *O.s.* Gly  
822 tRNA sequence. **E.** Schematic of S2R+ prime editing experiment. **F.**

823 Quantification of precise editing and indels from S2R+ transfection experiments  
824 by amplicon sequencing. tfx, transfection.

825

826 **Supplemental Figure 1. Related to Figure 1. A.** Diagram of PE2 expression  
827 plasmid *pAct-PE2*. **B.** Schematic of experiments to detect and quantify insertion  
828 events in transfected S2R+ cells. **C.** DNA gel images of targeted PCR  
829 amplification of the insertion site. **D.** Quantification of precise *ebony*<sup>23bpBC</sup>  
830 insertion and indel percentage from S2R+ transfection experiments by amplicon  
831 sequencing. **E.** *white* and *forked* genomic region showing target site and installed  
832 edits (*white*<sup>A134X</sup> and *forked*<sup>D111X</sup>).

833

834 **Figure 2. Prime editing in flies. A.** Schematic of transgenic expression of prime  
835 editing components in flies and editing at an endogenous locus. Enhancer-  
836 specific Gal4 directs the spatial and developmental timing of PE2 expression. **B.**  
837 Quantification of adult fly viability from ubiquitous PE2 expression during  
838 developmental stages and raised at either 25°C or 29°C. *Act-Gal4/CyO* or *tub-*  
839 *Gal4/TM3* were crossed with *UAS-PE2* (Chr. II), *UAS-PE2* (Chr. III), or *UAS-*  
840 *empty* (negative control), and the percentage of progeny with or without the  
841 balancer was calculated. Number of flies scored from left to right = 748, 687, 655,  
842 157, 267, 202, 294, 413, 226, 131, 277, 238. **C.** Schematic of genetic crosses  
843 between ubiquitous PE2 and pegRNA transgenic flies. **D.** Images of adult flies  
844 with somatic editing using *Act>PE2*. Views of the dorsal side of whole adults  
845 (top), scutellum (middle), and eye (bottom). Negative control is *attP40* and  
846 classical loss of function allele shown on right. Females shown for editing of  
847 *ebony* and *forked*, males shown for *white* editing.  $e^1 = w^1$ ;  $TM3, e^1/TM6b, e^1, f^1 =$   
848  $y^1, w^1, f^1$ . **E.** Quantification of precise somatic editing and indel percentage in  
849 adult flies by amplicon sequencing. Error bars show mean with SD. N=3 adult  
850 flies. **F.** Schematic of two generation genetic crosses between germ cell PE2 and  
851 pegRNA flies. **G.** Quantification of adult cuticle pigmentation (WT vs. *ebony*) in  
852 G2 flies for three temperature conditions. Sex of G1 parent(s) is indicated above  
853 graph. For the pooled crosses (10 G1 flies each, left of dotted line), the number  
854 of G2 flies analyzed was (left to right) 453, 518, 574, 413, 702, 405, 514, 454,  
855 514, 405, 376, 493, 557, 492, 510, 562, 471, 481. For single fly G1 crosses (right  
856 of dotted line), the number of G2 flies analyzed was (left to right) 209, 109, 76,  
857 139, 176, 104, 147, 275, 222. **H.** Quantification of Sanger sequencing analysis of  
858 individual G2 flies from single G1 crosses. Eight G2 progeny were analyzed for  
859 each of the nine G1 crosses. Sex of G1 parent is indicated above graph. **I.**  
860 Sequence of the *ebony* target site in 72 mutant *ebony* G2 flies. **J.** Sequence  
861 chromatogram (left) and image (right) of wild-type and *ebony*<sup>G111X</sup> homozygous  
862 adult flies.

863

864 **Supplemental Figure 2. Related to Figure 2. A.** Images of adult flies with  
865 somatic editing using *tub>PE2*. Views of the dorsal side of whole adults (top),  
866 scutellum (middle), and eye (bottom). Negative control is *attP40* and classical  
867 loss of function allele shown on right. Females shown for editing of *ebony* and  
868 *forked*, males shown for *white* editing. **B.** Diagram of PE2 expression transgene

869 *nos-PE2*. *nos*, *nanos*; NLS, Nuclear localization sequence; 3' UTR, *nanos* 3'  
870 UTR; *v+*, *vermillion+* rescue transgene; *attB*,  $\phi$ C31 recombination site.

871

872 **Supplemental File 1. pegRNA and sgRNA sequences**

873

874 **Supplemental File 2. Oligo and dsDNA sequences**

875

876 **Supplemental File 3. pegRNA design and cloning protocols**

877

878 **Supplemental File 4. Amplicon sequencing data key**

879

880

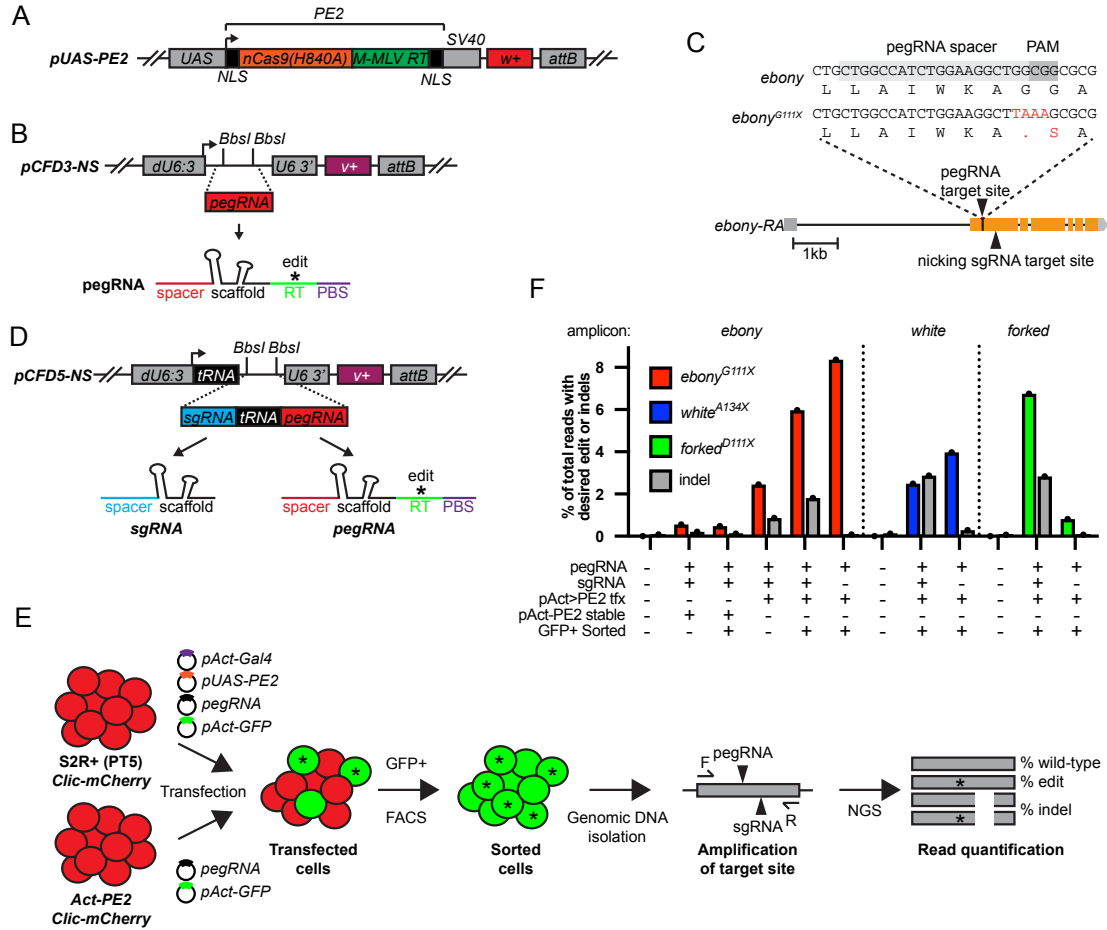

Figure 1

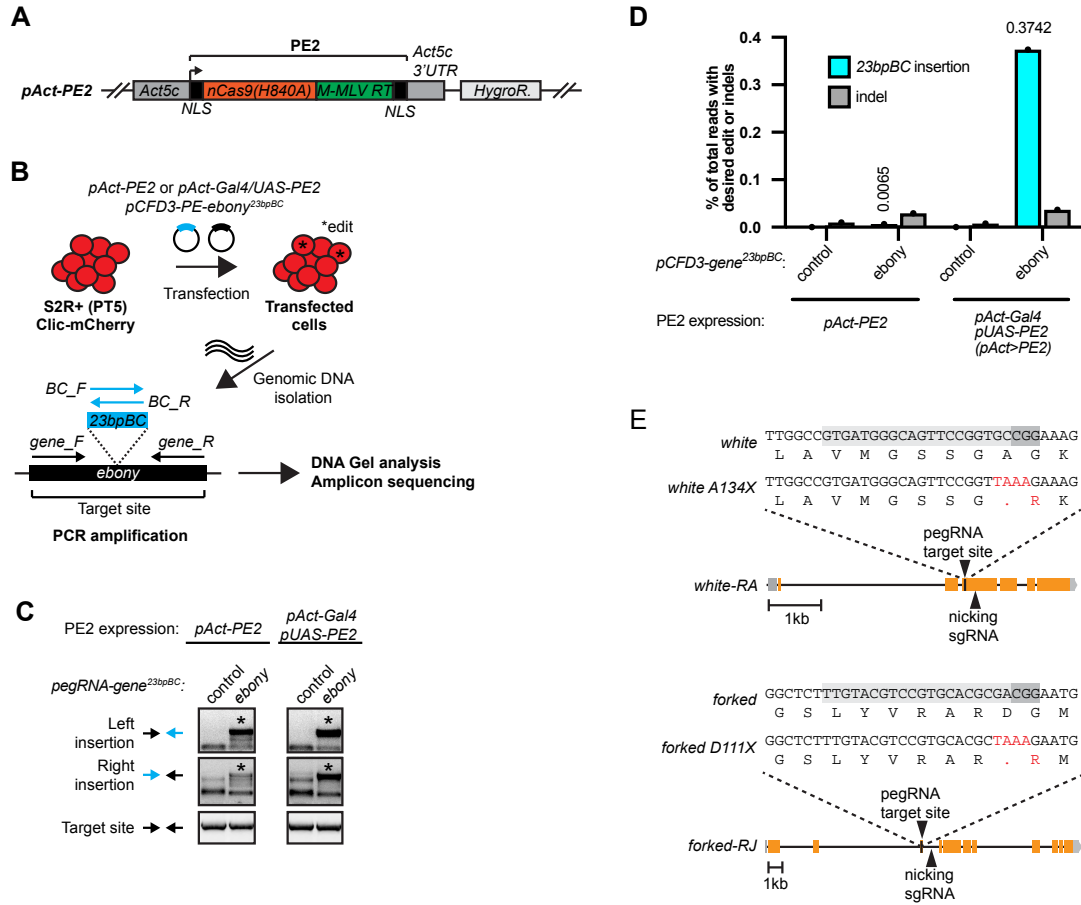

Supplemental Figure 1

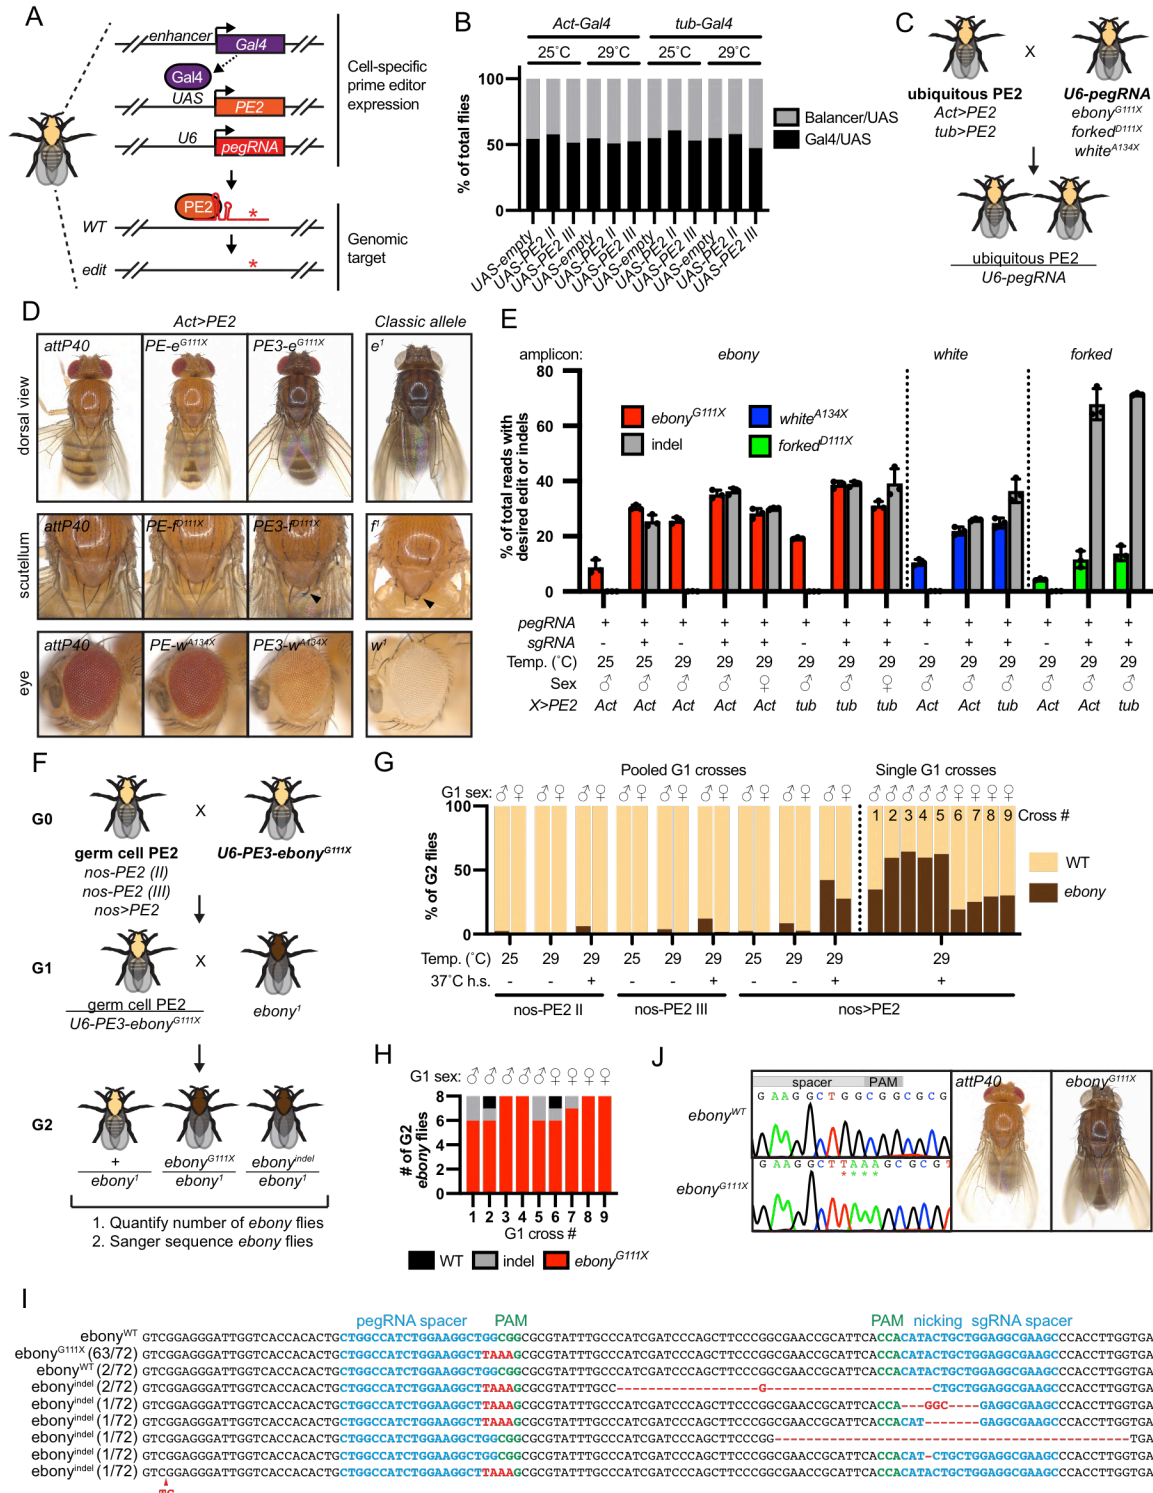

Figure 2

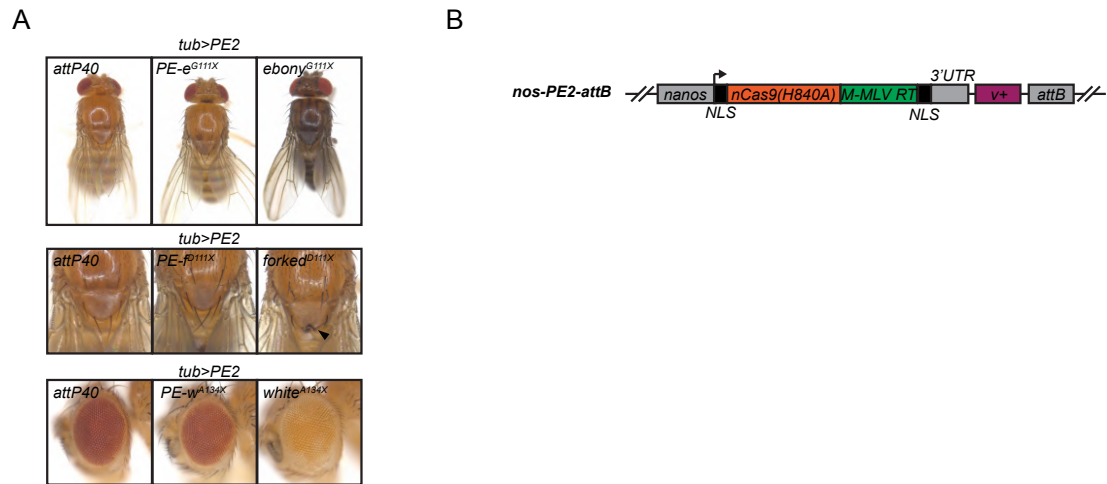

Supplemental Figure 2



| Supplemental File 1 - pegRNA and sgRNA sequences |                        |                                                                        |            |                    |               |                               |  |
|--------------------------------------------------|------------------------|------------------------------------------------------------------------|------------|--------------------|---------------|-------------------------------|--|
| pegRNA                                           | pegRNA spacer sequence | 3' extension                                                           | PBS length | RT template length | nicking sgRNA | nicking sgRNA spacer sequence |  |
| ebony_pFP545_23bpBC                              | CTGGCCATCTGGAAAGGCTGG  | GAAGCTGGGATCGATGGGCAANTACGGCGCCCAaacagggccgaagtgttctttaggGCCTTCCAGATGG | 13         | 34                 |               |                               |  |
| ebony_pFP545_G111X                               | CTGGCCATCTGGAAAGGCTGG  | GGCAANTACGGCGctttaAGCCTTCCAGATGG                                       | 13         | 18                 | ebony_+57     | GCTTCGCCTCCAGAGTATG           |  |
| white_ex3-3_A134X                                | GTGATGGGCAGTCCGGTGC    | AGGGTCGTCTTTCcttaACCGGAAGTCCCA                                         | 13         | 18                 | white_+70     | TTGAGCAGTCCGATCCCGGA          |  |
| forked_pFP801_D111X                              | TTGTACGTCCGTGCACGCGA   | ATCGGTGCCATTctttaGCGTGCACGGACGT                                        | 13         | 18                 | forked_+57    | ATCTACTCACCATCCATTG           |  |

| Supplemental File 2 - Oligo and dsDNA sequences |                                                                                                                                                                                                                                                                                                                                                                                                                                                            |                                                                                              |
|-------------------------------------------------|------------------------------------------------------------------------------------------------------------------------------------------------------------------------------------------------------------------------------------------------------------------------------------------------------------------------------------------------------------------------------------------------------------------------------------------------------------|----------------------------------------------------------------------------------------------|
| Name                                            | Sequence                                                                                                                                                                                                                                                                                                                                                                                                                                                   | Purpose                                                                                      |
| JB1633_pCFD3-NS_gBlock_BbsI-XbaI                | agttcgtatataatagacctatcttcaatttaacgtcggggctctcgagaagacctt<br>tttttgctacctggagcctgagagtgttcaataaaaaataaaatggttctgtttt<br>ttgctttccgacctatcttatcttttcaatcaatgatctcaattgggtatgtat<br>ttagtaattgtaataatagacaatgggtttccgtgacgtacacacatctgacgt<br>gtgtttatttagacataatagttatgttttcaacatcttttaagtctcgcttaag<br>cgtatgcatcttagacaattgtgctcggcaacagatatttgt                                                                                                          | gBlock to create pCFD3-NS                                                                    |
| JB1690_gBlock_pCFD5-NS                          | agttcgtatataatagacctatcttcaatttaacgtcggggctctgagtggtgtag<br>acatcaagcactcgggtggtcagtggtagaatgctcgcctgcaacggggcggcccg<br>ggttgcattcccggccgagtgcaagggtctcgagaagacctttttttgctacctgg<br>agcctgagagtggttcaataaaaaataaaatggttctgtttttttgcttcgcaagta<br>tttatcttttttcaacatctgattcaatttggtagtattagtaattgtaata<br>tatagacaatgggtttccgtgacgtacacacatctgacgtggtttatttagaca<br>taattagttatgttttcaacatcttttaagtctcgcttaagtggtatgcatctaga<br>caattgtgctcggcaacagatatttgt | gBlock to create pCFD5-NS                                                                    |
| JB265_Gibson_pEntr_1F                           | AAGGTTGGCCGCCCGCAC                                                                                                                                                                                                                                                                                                                                                                                                                                         | Amplifies pEntr backbone for Gibson assembly                                                 |
| JB266_Gibson_pEntr_1R                           | GGTAAAGGGGGCGCCCGC                                                                                                                                                                                                                                                                                                                                                                                                                                         | Amplifies pEntr backbone for Gibson assembly                                                 |
| JB1615_PE2_pEntr_F                              | ccggcccgccccctccaccatgaaacggacagccgac                                                                                                                                                                                                                                                                                                                                                                                                                      | Amplifies PE2 coding sequence to assemble with pEntr backbone by Gibson                      |
| JB1616_PE2_stop_pEntr_R                         | gggtcggcggcccccaccttttagactttctcttctcttcttggg                                                                                                                                                                                                                                                                                                                                                                                                              | Amplifies PE2 coding sequence to assemble with pEntr backbone by Gibson                      |
| JB1613_PE2-nosbackbone_XbaI-AvrII_F             | TCGCCTGAATTgagatctctCTAGAggtacGCCACatgaaacggacagccgac                                                                                                                                                                                                                                                                                                                                                                                                      | Amplifies PE2 coding sequence to assemble with pNos backbone by Gibson                       |
| JB1614_PE2-nosbackbone_XbaI-AvrII_R             | TAAACCTcagtggtgactcctctaggtgctagAtttagactttctcttctcttctggg                                                                                                                                                                                                                                                                                                                                                                                                 | Amplifies PE2 coding sequence to assemble with pNos backbone by Gibson                       |
| JB157_Gibson_MT-GW_backbone_1F                  | ACCGAGAGCATCTGGCCA                                                                                                                                                                                                                                                                                                                                                                                                                                         | Amplifies MK33-GW backbone to assemble with Actin5c promoter                                 |
| JB158_Gibson_MT-GW_backbone_1R                  | GATCCAGACATGATAAGATACATTGATGAG                                                                                                                                                                                                                                                                                                                                                                                                                             | Amplifies MK33-GW backbone to assemble with Actin5c promoter                                 |
| JB159_Gibson_MT-GW_actP_1F                      | tatcttatcatgtctggatcGCATGCAATTCATATCTATAAAAACACAAATG                                                                                                                                                                                                                                                                                                                                                                                                       | Amplifies Actin5c promoter to insert into MK33-GW by Gibson                                  |
| JB160_Gibson_MT-GW_actP_1R                      | atggccagatgctctcggtATCTGGATCCGGGCTCTC                                                                                                                                                                                                                                                                                                                                                                                                                      | Amplifies Actin5c promoter to insert into MK33-GW by Gibson                                  |
| ebony_targetsite_F                              | GAGGATTTGGTACCACACT                                                                                                                                                                                                                                                                                                                                                                                                                                        | Amplifies indicated target site from genomic DNA, used to amplify in ebony23pbBC experiments |
| ebony_targetsite_2F                             | CCGGTTCCTCGACCAACA                                                                                                                                                                                                                                                                                                                                                                                                                                         | Amplifies indicated target site from genomic DNA, used to amplify in ebonyG111X experiments  |
| ebony_targetsite_R                              | GGGATTTGGCATACAGTTCG                                                                                                                                                                                                                                                                                                                                                                                                                                       | Amplifies indicated target site from genomic DNA                                             |
| white_targetsite_F                              | TTCCGAGTCCGCTGATCTGT                                                                                                                                                                                                                                                                                                                                                                                                                                       | Amplifies indicated target site from genomic DNA                                             |
| white_targetsite_R                              | CACAGGTTGGCCATTGAGCA                                                                                                                                                                                                                                                                                                                                                                                                                                       | Amplifies indicated target site from genomic DNA                                             |
| forked_targetsite_F                             | ACGATGTCACGCCCGTTTAC                                                                                                                                                                                                                                                                                                                                                                                                                                       | Amplifies indicated target site from genomic DNA                                             |
| forked_targetsite_R                             | CAACTGCTCGAGTTGGCCAA                                                                                                                                                                                                                                                                                                                                                                                                                                       | Amplifies indicated target site from genomic DNA                                             |
| JB1647_BC_F                                     | TAAGAACACTTGGCCCTGT                                                                                                                                                                                                                                                                                                                                                                                                                                        | Binds to inserted 23bp BC for amplification of insertions                                    |
| JB1647_BC_R                                     | ACAGCCCGCAAGTGTCTTA                                                                                                                                                                                                                                                                                                                                                                                                                                        | Binds to inserted 23bp BC for amplification of insertions                                    |
| JB1637_scaffold_top                             | GTTTTAGAGCTAGAAATAGCAAGTTAAATAAAGGCTAGTCCGTTATCAACTTGAAA<br>AAGTGGCAACGACTCG                                                                                                                                                                                                                                                                                                                                                                               | sgRNA scaffold for annealing and cloning a pegRNA into pCFD3-NS                              |
| JB1638_scaffold_bot                             | GCACGACTCGGTGCCACTTTTCAAGTTGATAACGGACTAGCTATTTTAACTT<br>GCTATTCTTAGCTCTA                                                                                                                                                                                                                                                                                                                                                                                   | sgRNA scaffold for annealing and cloning a pegRNA into pCFD3-NS                              |
| JB1639_ebony_pFP545_spacer_top                  | gtcgcTGGCCATCTGGAAGGCTGG                                                                                                                                                                                                                                                                                                                                                                                                                                   | ebony_23pbBC pegRNA spacer for annealing and cloning into pCFD3-NS                           |
| JB1640_ebony_pFP545_spacer_bot                  | aaacCCAGCCTTCCAGATGGCCAG                                                                                                                                                                                                                                                                                                                                                                                                                                   | ebony_23pbBC pegRNA spacer for annealing and cloning into pCFD3-NS                           |
| JB1641_ebony_pFP545_3'ext_top                   | gtgcGAAAGCTGGGATCGATGGGCAAAATACGCGCCCAACAGGCCGCAAGTGTTC<br>TTAGGCCCTCCAGATGG                                                                                                                                                                                                                                                                                                                                                                               | ebony_23pbBC pegRNA 3'extension for annealing and cloning into pCFD3-NS                      |
| JB1642_ebony_pFP545_3'ext_bot                   | aaaaCCATCTGGAAGGCCCTAAGAACACTTGGCCGCTGTTTGGCGGCCTATTGG<br>CCATCGATCCAGCTTC                                                                                                                                                                                                                                                                                                                                                                                 | ebony_23pbBC pegRNA 3'extension for annealing and cloning into pCFD3-NS                      |
| JB1721_pCFD5-NS_ebony_pFP545_G111X_PE3_gBlock1  | cggttcgatcccggccgagtcgacgtctgcctccagcagataggttttagagcta<br>gaaatagcaagttaaaataaggctagtcogttatcaactgaaaaaaggccaccca<br>gtcgggtgctaacaagcaccagtggtctagtggtagaatagtagtaccctgccacggta<br>cagacc                                                                                                                                                                                                                                                                | ebonyG111X sgRNA-trRNA-pegRNA to clone into pCFD5-NS                                         |
| JB1724_pCFD5-NS_ebony_pFP545_G111X_PE3_gBlock2  | taacaaagcaccagtggtctagtggtagaatagtagtaccctgccacggtaacagaccg<br>ggttcgattcccggctggtgcaactggccatctggaaggctgggttttagagctaga<br>aatagcaagttaaaataaggctagtcogttatcaactgaaaaaaggccaccca<br>cggtgcGCCAAATACGCGCcttaAGCCTTCCAGATGGTtttttgctacctggagc<br>ctgag                                                                                                                                                                                                      | ebonyG111X sgRNA-trRNA-pegRNA to clone into pCFD5-NS                                         |
| JB1722_pCFD5-NS_white_ex3-3_A134X_PE3_gBlock1   | cggttcgatcccggccgagtcgacgtctgcctccagcagataggttttagagcta<br>gaaatagcaagttaaaataaggctagtcogttatcaactgaaaaaaggccaccca<br>gtcgggtgctaacaagcaccagtggtctagtggtagaatagtagtaccctgccacggta<br>cagacc                                                                                                                                                                                                                                                                | whiteA134X sgRNA-trRNA-pegRNA to clone into pCFD5-NS                                         |
| JB1725_pCFD5-NS_white_ex3-3_A134X_PE3_gBlock2   | taacaaagcaccagtggtctagtggtagaatagtagtaccctgccacggtaacagaccg<br>ggttcgattcccggctggtgcaactggccatctggaaggctgggttttagagctaga<br>aatagcaagttaaaataaggctagtcogttatcaactgaaaaaaggccaccca<br>cggtgcAGGTCCTTTCTcttaACCGAACTGCCAttttttgctacctggagc<br>ctgag                                                                                                                                                                                                          | whiteA134X sgRNA-trRNA-pegRNA to clone into pCFD5-NS                                         |
| JB1723_pCFD5-NS_forked_pFP801_D111X_PE3_gBlock1 | cggttcgatcccggccgagtcgacgtctgcctccagcagataggttttagagcta<br>gaaatagcaagttaaaataaggctagtcogttatcaactgaaaaaaggccaccca<br>gtcgggtgctaacaagcaccagtggtctagtggtagaatagtagtaccctgccacggta<br>cagacc                                                                                                                                                                                                                                                                | forkedD111X sgRNA-trRNA-pegRNA to clone into pCFD5-NS                                        |
| JB1726_pCFD5-NS_forked_pFP801_D111X_PE3_gBlock2 | taacaaagcaccagtggtctagtggtagaatagtagtaccctgccacggtaacagaccg<br>ggttcgattcccggctggtgcaactggccatctggaaggctgggttttagagctaga<br>aatagcaagttaaaataaggctagtcogttatcaactgaaaaaaggccaccca<br>cggtgcATCGTGCCTTCTcttaGCGTGCACGGAGCTtttttgctacctggagc<br>ctgag                                                                                                                                                                                                        | forkedD111X sgRNA-trRNA-pegRNA to clone into pCFD5-NS                                        |

## Supplemental File 3 pegRNA cloning for Prime Editing in *Drosophila*, June 2020, Version 1.0

Justin Bosch, Perrimon Lab, Harvard Medical School

### Table of contents

- A. Introduction
- B. pegRNA and nicking sgRNA design
- C. Oligo and dsDNA design
- D. Cloning protocol for *pCFD3-NS* using annealed oligos
- E. Cloning protocol for *pCFD3-NS* using a dsDNA fragment
- F. Cloning protocol for *pCFD5-NS* using two dsDNA fragments

**A. Introduction:** These protocols are used to assemble plasmids to express pegRNAs under the control of the *Drosophila U6-3* promoter. pegRNAs are designed to make a precise edit in the genome, and optional nicking sgRNAs are designed to enhance prime editing efficiency (PE3 system). To express pegRNAs and sgRNAs, they are encoded in annealed oligos or dsDNA fragments, and then cloned into one of two empty expression plasmids. *pCFD3-NS* is used for expression of a single pegRNA. *pCFD5-NS* is used for expression of a pegRNA/sgRNA pair. *pCFD3-NS* and *pCFD5-NS* do not contain a sgRNA scaffold (NS = No Scaffold), and are slight modifications of the sgRNA-expression plasmids *pCFD3* and *pCFD5* (PORT *et al.* 2014; PORT AND BULLOCK 2016). *pCFD3-NS* and *pCFD5-NS* contain an *attB* site for phiC31 integration and a *vermillion+* marker to select transgenic flies.

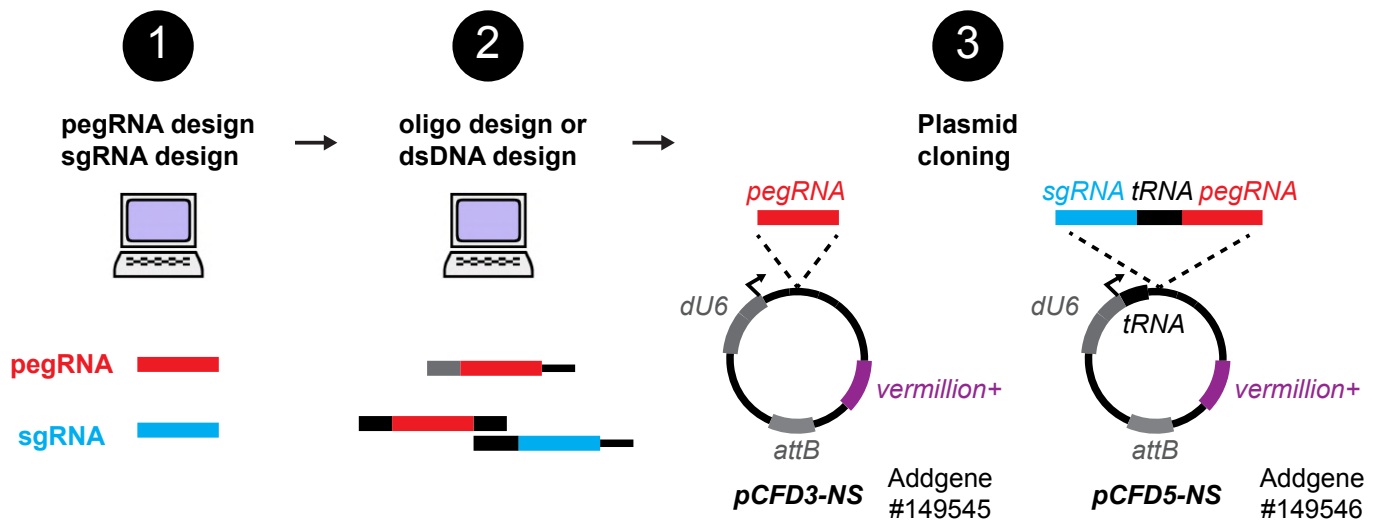

### Summary of pegRNA-expression plasmids:

| Plasmid         | Addgene # | Promoter     | Used to express | Cloning methods           | Fly marker         | Bacterial resistance |
|-----------------|-----------|--------------|-----------------|---------------------------|--------------------|----------------------|
| <i>pCFD3-NS</i> | 149545    | <i>dU6:3</i> | pegRNA          | Annealed oligos/T4 Ligase | <i>vermillion+</i> | Ampicillin           |
|                 |           |              |                 | 1 dsDNA fragment/Gibson   |                    |                      |
| <i>pCFD5-NS</i> | 149546    | <i>dU6:3</i> | sgRNA + pegRNA  | 2 dsDNA fragments/Gibson  | <i>vermillion+</i> | Ampicillin           |

## B. pegRNA and nicking sgRNA design

Automatic design (recommended):

PrimeDesign (HSU *et al.* 2020): <http://primedesign.pinelloab.org/>

pegFinder (CHOW *et al.* 2020): <http://pegfinder.sidichenlab.org/>

Manual design (optional):

1. Create wild-type (WT) and edited sequence files for annotation
2. WT sequence - select a pegRNA spacer near the desired edit, ensuring the edit is 3' to nick site.
3. Edited sequence - annotate the primer binding site (PBS) by selecting ~13bp 5' to the nick site.
4. Edited sequence - annotate the reverse transcribed (RT) region by selecting ~13-18bp 3' to nick site.
5. Edited sequence - The reverse complement of the PBS-edit-RT sequence is the pegRNA 3' extension.
6. WT sequence - select a sgRNA target on the non-edited strand between +40 and +90 from the pegRNA nick.

Notes:

- Avoid starting pegRNA 3' extension with a "C".
- Edits or silent mutations that affect the PAM or pegRNA spacer sequence increase efficiency.
- Use a shorter RT sequence if region has high G:C content.

Example pegRNA and nicking sgRNA design:

pegRNA spacer

nicking sgRNA spacer

PAM

nick = |

PBS

RT

edit

scaffold

>ebony\_WT

```
CCGGTTCCTGCAGCCAAACAGCGATGGTGACTTCATCGTGGCTGTGTGCATGCAGCCGTCGGAGGGATTGGTCACCACT  
GCTGGCCATCTGGAAGGC|TGGCGGCGCGTATTTGCCATCGATCCCAGCTTCCCGGCGAACCGCATTCAACAT|ACTG  
CTGGAGGCGAAGC|CCACCTTGGTGATTTCGCGACGATGACATCGACGCCGCGCTTCCAGGGAACCTCCACGTTATCCACC  
ACCGAACTGTATGCCAAATCCC
```

>ebony\_GGCG331-334TAAA\_G111X

```
CCGGTTCCTGCAGCCAAACAGCGATGGTGACTTCATCGTGGCTGTGTGCATGCAGCCGTCGGAGGGATTGGTCACCACT  
GCTGGCCATCTGGAAGGC|TtaaGCGCGTATTTGCCATCGATCCCAGCTTCCCGGCGAACCGCATTCAACACATACTGCT  
GGAGGCGAAGCCACCTTGGTGATTTCGCGACGATGACATCGACGCCGCGCTTCCAGGGAACCTCCACGTTATCCACC  
CGAACTGTATGCCAAATCCC
```

>pegRNA\_spacer

CTGGCCATCTGGAAGGCTGG

>pegRNA\_extension

GGCAAATACGCGCttaaAGCCTTCCAGATGG

>nicking\_sgRNA\_spacer

GCTTCGCCTCCAGCAGTATG

>pegRNA

CTGGCCATCTGGAAGGCTGGGTTTTAGAGCTAGAAATAGCAAGTTAAATAAAGGCTAGTCCGTTATCAACTTGAAAAAGTG  
GCACCGAGTCGGTGC|GGCAAATACGCGCttaaAGCCTTCCAGATGG

>nicking\_sgRNA

GCTTCGCCTCCAGCAGTATGGTTTTAGAGCTAGAAATAGCAAGTTAAATAAAGGCTAGTCCGTTATCAACTTGAAAAAGTG  
GCACCGAGTCGGTGC

## C. Oligo and dsDNA design

### C1. For cloning into pCFD3-NS by T4 ligation (single pegRNA) (See section D)

Order oligos with overhangs (5' lowercase sequence)

>pegRNA\_spacer\_top

gtcgCTGGCCATCTGGAAGGCTGG

>pegRNA\_spacer\_bot

aaacCCAGCCTTCCAGATGGCCAG

>Scaffold\_top:

gtttTAGAGCTAGAAATAGCAAGTTAAAATAAGGCTAGTCCGTTATCAACTTGAAAAAGTGGCACCGAGTCG

>Scaffold\_bot:

gcacCGACTCGGTGCCACTTTTTCAAGTTGATAACGGACTAGCCTTATTTTAACTTGCTATTTCTAGCTCTA

>pegRNA\_extension\_top

gtgcGGCAAATACGCGCttaaAGCCTTCCAGATGG

>pegRNA\_extension\_bot

aaaaCCATCTGGAAGGCttaaGCGCGTATTTGCC

Annealed oligos:

>pegRNA\_spacer

5'-gtcgCTGGCCATCTGGAAGGCTGG-3'  
3'-GACCGGTAGACCTTCCGACCaaa-5'

>Scaffold

5'-gtttTAGAGCTAGAAATAGCAAGTTAAAATAAGGCTAGTCCGTTATCAACTTGAAAAAGTGGCACCGAGTCG-3'  
3'-ATCTCGATCTTTATCGTTCAATTTTATTCCGATCAGGCAATAGTTGAACTTTTTACCCTGGCTCAGCcacg-5'

>pegRNA\_extension

5'-gtgcGGCAAATACGCGCttaaAGCCTTCCAGATGG-3'  
3'-CCGTTTATGCGCGaatTCGGAAGGTCTACCaaaa-5'

Cloning:

>pCFD3-NS cut w/ BbsI

5'-agacctatthttcaatttaac ttttttgctacctggagcctgag-3'  
3'-tctggataaaaagttaaattgcagc aacggatggacctcggactc-5'

>pCFD3-pegRNA\_final

agacctatthttcaatttaacgtcgCTGGCCATCTGGAAGGCTGGGTTTTAGAGCTAGAAATAGCAAGTTAAAATAAGGC  
TAGTCCGTTATCAACTTGAAAAAGTGGCACCGAGTCGGTGC GGCAAATACGCGCttaaAGCCTTCCAGATGGttttttg  
cctacctggagcctgag

### C2. dsDNA to clone into pCFD3-NS by Gibson assembly (single pegRNA) (See section E)

Append homology arms (black, lowercase) to pegRNA that overlap with pCFD3-NS cut w/ BbsI.

>dsDNA\_fragment\_pCFD3-NS

agacctatthttcaatttaacgtcgCTGGCCATCTGGAAGGCTGGGTTTTAGAGCTAGAAATAGCAAGTTAAAATAAGGC  
GGCTAGTCCGTTATCAACTTGAAAAAGTGGCACCGAGTCGGTGC GGCAAATACGCGCttaaAGCCTTCCAGATGGt  
tttttgctacctggagcctgag

## Cloning:

```
>pCFD3-NS cut w/ BbsI
5'-agacctatthttcaatttaac          ttttttgctacctggagcctgag-3'
3'-tctggataaaaagttaaattgcagc     aacggatggacctcggactc-5'
```

```
>pCFD3-pegRNA_final
agacctatthttcaatttaacgctcCTGGCCATCTGGAAGGCTGGGTTTTAGAGCTAGAAATAGCAAGTTAAAATAAGGC
TAGTCCGTTATCAACTTGAAAAAGTGGCACCGAGTCGGTGCGGCAAATACGCGCtttaGCCTTCCAGATGGttttttg
cctacctggagcctgag
```

Note: If needed, homology arms can be extended longer (~100bp each). This can help decrease complexity scores using IDT gBlocks.

## C3. dsDNAs to clone into pCFD5-NS by Gibson assembly (nicking sgRNA and pegRNA) (See section F)

Append homology arms (black, lowercase) to nicking sgRNA and pegRNA that overlap with pCFD3-NS cut w/ BbsI and encode rice Os-tRNA<sup>Gly</sup> (lowercase, italic)

```
>dsDNA_fragment1_pCFD5-NS
cgggttcgattcccggccgatgcaGCTTCGCCTCCAGCAGTATGGTTTTAGAGCTAGAAATAGCAAGTTAAAATAA
GGCTAGTCCGTTATCAACTTGAAAAAGTGGCACCGAGTCGGTGCaacaaagcaccagtgggtctagtggtagaatag
taccctgccacggtacagacc
```

```
>dsDNA_fragment2_pCFD5-NS
aacaaagcaccagtgggtctagtggtagaatagtaccctgccacggtacagacccgggttcgattcccggctgggtgc
aCTGGCCATCTGGAAGGCTGGGTTTTAGAGCTAGAAATAGCAAGTTAAAATAAGGCTAGTCCGTTATCAACTTGAA
AAAGTGGCACCGAGTCGGTGCGGCAAATACGCGCtttaGCCTTCCAGATGGttttttgctacctggagcctgag
```

```
>pCFD5-sgRNA-tRNA-pegRNA_final
cgggttcgattcccggccgatgcaGCTTCGCCTCCAGCAGTATGGTTTTAGAGCTAGAAATAGCAAGTTAAAATAA
GGCTAGTCCGTTATCAACTTGAAAAAGTGGCACCGAGTCGGTGCaacaaagcaccagtgggtctagtggtagaatag
taccctgccacggtacagacccgggttcgattcccggctgggtgcaCTGGCCATCTGGAAGGCTGGGTTTTAGAGCT
AGAAATAGCAAGTTAAAATAAGGCTAGTCCGTTATCAACTTGAAAAAGTGGCACCGAGTCGGTGCGGCAAATACGC
GCtttaGCCTTCCAGATGGttttttgctacctggagcctgag
```

## D. Cloning protocol for *pCFD3-NS* (Addgene # 149545) using annealed oligos

### D1. Design pegRNA and order oligos (see Sections B&C).

### D2. Digest/dephosphorylate *pCFD3-NS*

5µg *pCFD3-NS*  
3µl Bpil (cuts BbsI) (Fermentas, FD1014)  
3µl FastAP (Fermentas, EF0651)  
6µl 10x FastDigest Buffer  
Xµl H<sub>2</sub>O  
60ul total

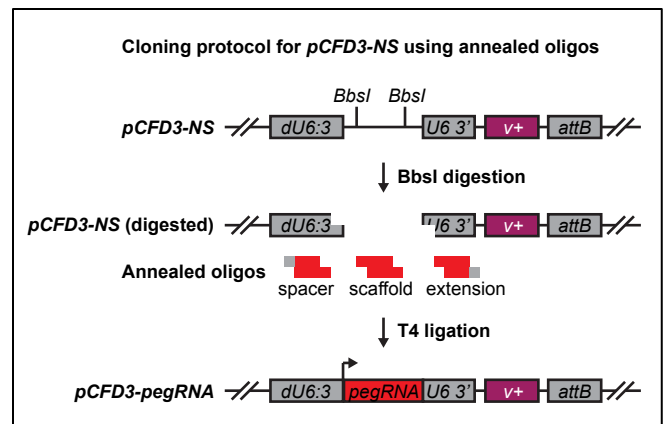

### D3. Gel-purify digested *pCFD3-NS* backbone (~6.2kb).

### D4. Phosphorylate and anneal each pair of oligos in PCR tubes

1µl Top oligo (100µM)  
1µl Bottom oligo (100µM)  
1µl 10x T4 Ligation buffer (NEB, B0202S)  
6.5µl H<sub>2</sub>O  
.5µl T4 PNK (NEB, M0201)  
10µl total

37°C for 30min, 95°C for 5min, then ramp down to 25°C at 5°C/min

### D5. Dilute annealed/phosphorylated oligos 1:200 in H<sub>2</sub>O

### D6. Ligate annealed oligos into digested *pCFD3-NS*

Xµl digested *pCFD3-NS* (50ng)  
1µl **spacer** diluted annealed oligo  
1µl **scaffold** diluted annealed oligo  
1µl **3' extension** diluted annealed oligo  
1.5µl 10x T4 Ligation Buffer (NEB, B0202S)  
Xµl H<sub>2</sub>O  
1µl T4 DNA ligase (NEB, M0202)  
15µl total

Incubate reaction at room temperature for 30min.

### D7. Transform ligation into competent cells and grow colonies on LB-agar Ampicillin plates

### D8. (Optional) Colony PCR to identify candidate pegRNA plasmids

*pCFD3*genoF ACGTTTTATAACTTATGCCCTAAG  
*pCFD3*genoR GCCGAGCACAAATTGTCTAGAATGC

Uncut backbone = 490bp  
Correct insert = 638bp (depends on pegRNA length)

### D9. Culture colonies with LB + Ampicillin and sequence confirm plasmids

*pCFD3*seqF ACCTACTCAGCCAAGAGGC

## E. Cloning protocol for *pCFD3-NS* (Addgene # 149545) using a dsDNA fragment

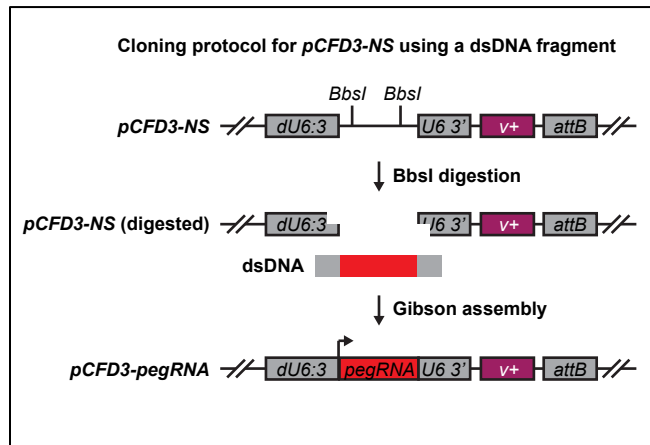

**E1. Design pegRNA and order dsDNA fragment (see Sections B&C).**

**E2. Digest/dephosphorylate plasmid**

5µg *pCFD3-NS*  
3µl Bpil (cuts BbsI) (Fermentas, FD1014)  
3µl FastAP (Fermentas, EF0651)  
6µl 10x FastDigest Buffer  
Xµl H<sub>2</sub>O  
60ul total

**E3. Gel-purify digested *pCFD3-NS* backbone (~6.2kb).**

**E4. Gibson assembly**

Xµl digested *pCFD3-NS* (50ng)  
Xµl dsDNA fragment (5ng)  
2.5µl Gibson master mix (NEB, E2611)  
Xµl H<sub>2</sub>O  
5µl total

Incubate reaction at 50°C for 30min.

**E5. Transform ligation into competent cells and grow colonies on LB-agar Ampicillin plates**

**E6. (Optional) Colony PCR to identify candidate pegRNA plasmids**

*pCFD3*genoF ACGTTTTATAACTTATGCCCCTAAG  
*pCFD3*genoR GCCGAGCACAATTGTCTAGAATGC

Uncut backbone = 490bp  
Correct insert = 638bp (depends on pegRNA length)

**E7. Culture colonies with LB + Ampicillin and sequence confirm plasmids**

*pCFD3*seqF ACCTACTCAGCCAAGAGGC



## F. Cloning protocol for *pCFD5-NS* (Addgene # 149546) using two dsDNA fragments

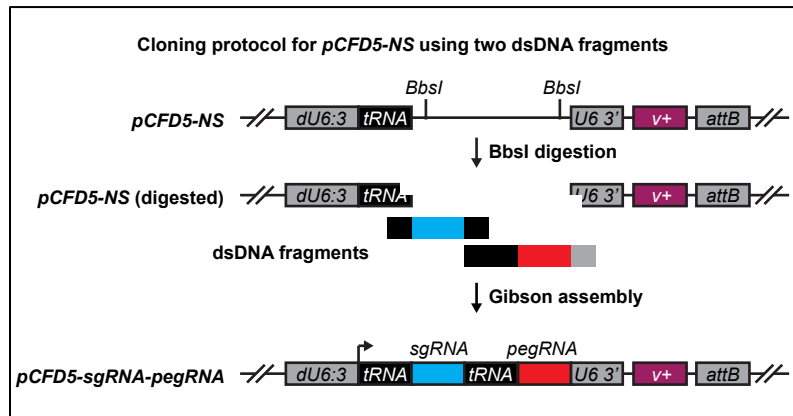

**F1. Design *pegRNA* and nicking *sgRNA*, and order dsDNA fragments (see Sections B&C).**

**F2. Digest/dephosphorylate plasmid**

5µg *pCFD5-NS*  
3µl *Bpil* (cuts *BbsI*) (Fermentas, FD1014)  
3µl FastAP (Fermentas, EF0651)  
6µl 10x FastDigest Buffer  
Xµl H<sub>2</sub>O  
60ul total

**F3. Gel-purify digested *pCFD5-NS* backbone (~6.3kb).**

**F4. Gibson assembly**

Xµl digested *pCFD5-NS* (50ng)  
Xul dsDNA fragment 1 (5ng)  
Xul dsDNA fragment 2 (5ng)  
2.5µl Gibson master mix (NEB, E2611)  
Xµl H<sub>2</sub>O  
5ul total

Incubate reaction at 50°C for 30min.

**F5. Transform ligation into competent cells and grow colonies on LB-agar Ampicillin plates**

**F6. (Optional) Colony PCR to identify candidate *pegRNA* plasmids**

*pCFD3genoF* ACGTTTTATAACTTATGCCCTAAG  
*pCFD3genoR* GCCGAGCACAATTGTCTAGAATGC

Uncut backbone = 587bp  
Correct insert = ~846bp (depends on *pegRNA* length)

**F7. Culture colonies with LB + Ampicillin and sequence confirm plasmids**

*pCFD3seqF* ACCTACTCAGCCAAGAGGC

## References:

- Chow, R. D., J. S. Chen, J. Shen and S. Chen, 2020 pegFinder: A pegRNA designer for CRISPR prime editing. bioRxiv.
- Hsu, J. Y., A. V. Anzalone, J. Grünewald, K. C. Lam, M. W. Shen *et al.*, 2020 PrimeDesign software for rapid and simplified design of prime editing guide RNAs. bioRxiv.
- Port, F., and S. L. Bullock, 2016 Augmenting CRISPR applications in *Drosophila* with tRNA-flanked sgRNAs. *Nat Methods* 13: 852-854.
- Port, F., H. M. Chen, T. Lee and S. L. Bullock, 2014 Optimized CRISPR/Cas tools for efficient germline and somatic genome engineering in *Drosophila*. *Proc Natl Acad Sci U S A* 111: E2967-2976.
